# Supplementary material for: How well do process-based and data-driven hydrological models learn from limited discharge data?
Source: Copernicus journal article supplement (doi:10.5194/hess-29-5005-2025), 2025-10-08
Supplement: Supplementary file 1 [file hess-29-5005-2025-supplement.pdf]

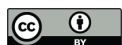

## *Supplement of*

# **How well do process-based and data-driven hydrological models learn from limited discharge data?**

**Maria Staudinger et al.**

*Correspondence to:* Maria Staudinger ([maria.staudinger@geo.uzh.ch](mailto:maria.staudinger@geo.uzh.ch))

The copyright of individual parts of the supplement might differ from the article licence.

## S1 Parameter ranges for the different process-based models

**Table S1.** Parameter ranges used for the GR4J model, plus snow parameters

| Parameter | Min  | Max  | Description                       |
|-----------|------|------|-----------------------------------|
| x01       | 0.01 | 1.5  | Capacity of production store      |
| x02       | -5.0 | 5.0  | Water exchange coefficient        |
| x03       | 1.0  | 500  | Capacity of routing store         |
| x04       | 0.5  | 5.0  | Time parameter of unit hydrograph |
| x05       | 0.0  | 500  | Average annual snow               |
| x06       | 0.01 | 0.99 | Air snow coefficient              |

**Table S2.** Parameters ranges of the HBV model.

| Parameter | Min    | Max  | Description                                                                                                                                           |
|-----------|--------|------|-------------------------------------------------------------------------------------------------------------------------------------------------------|
| TT        | -2.5   | 2.5  | Threshold temperature [ $^{\circ}$ C]; threshold defining over which air temperature snow is melting and under which snow is accumulating             |
| SFCF      | 0.8    | 1.2  | Snow correction factor[-]; correcting the snow input to account for gauge under-catch (overcatch)                                                     |
| CFMAX     | 2.0    | 15   | degree day factor [mm/d $^{\circ}$ C]; defining the rate of snowmelt per degree temperature                                                           |
| LP        | 0.0    | 1.0  | threshold reduction ETP [-]; reducing the potential ET to estimate actual ET                                                                          |
| FC        | 50     | 1000 | Maximum storage in soil box [mm]; defines the size of the soil bucket                                                                                 |
| BETA      | 1.0    | 5.0  | Shape coefficient [-]; shapes the relation between soil moisture [mm] and fraction of rain (or snowmelt) and thus its relative contribution to runoff |
| Alpha     | 0.0    | 1.0  | Shape coefficient [-]; shapes the relation between water storage in the upper groundwater (gw) bucket and drainage                                    |
| K1        | 0.01   | 0.4  | Recession coefficient (upper gw bucket) [1/d]                                                                                                         |
| PERC      | 0.0    | 6.0  | Max. flow from upper to lower gw box [-]                                                                                                              |
| K2        | 0.0001 | 0.1  | Recession coefficient (lower gw bucket) [1/d]                                                                                                         |
| MAXBAS    | 1.0    | 5.0  | Factor triangular weighting [d]                                                                                                                       |

**Table S3.** Parameter ranges used for the SWAT+ model.

| Parameter   | Min  | Max | Description                                |
|-------------|------|-----|--------------------------------------------|
| snomelt_tmp | -2.0 | 2.0 | Snowmelt temperature [ $^{\circ}$ C]       |
| esco        | 0.0  | 1.0 | Soil evaporation compensation factor       |
| epco        | 0.0  | 1.0 | Plant uptake compensation factor           |
| cn3_swf     | -0.5 | 0.5 | Soil water factor for cn3                  |
| awc         | 0.0  | 0.2 | Available water capacity of soil layer     |
| k           | 0.5  | 2.0 | Saturated hydraulic conductivity           |
| lat_ttime   | 0.5  | 50  | Lateral flow travel time                   |
| perco       | 0.0  | 1.0 | Percolation from upper to lower tank       |
| alpha       | 0.0  | 1.0 | Baseflow factor                            |
| surlag      | 0.2  | 8.0 | surface runoff lag coefficient             |
| cn2         | -10  | 10  | SCS curve number for moisture condition II |

## **S2 Settings Latin Hypercube Sampling**

For the Latin Hypercube Sampling, all model parameters were sampled in their provided range in 1,000 repetitions. All resulting 1,000 model runs, can be considered at once to cover all 10 sample sizes since the sampling strategy is independent of the model performance of previous runs. In contrast, evolutionary algorithms such as dynamically dimensioned search (DDS, Tolson and Shoemaker (2007)) or shuffled complex evolution algorithm (SCE-UA, Duan et al. (1992)) define their search based on the model performance value of previous runs, the sampling would be unique for each sample size. Therefore, each of the 30 repetitions would have to run separately for each sample size (10 times more computational effort). The Latin Hypercube Sampling was performed by using the Python framework SPOTPY (Houska et al., 2015).

### S3 Example of the Douglas Peucker sampling scheme

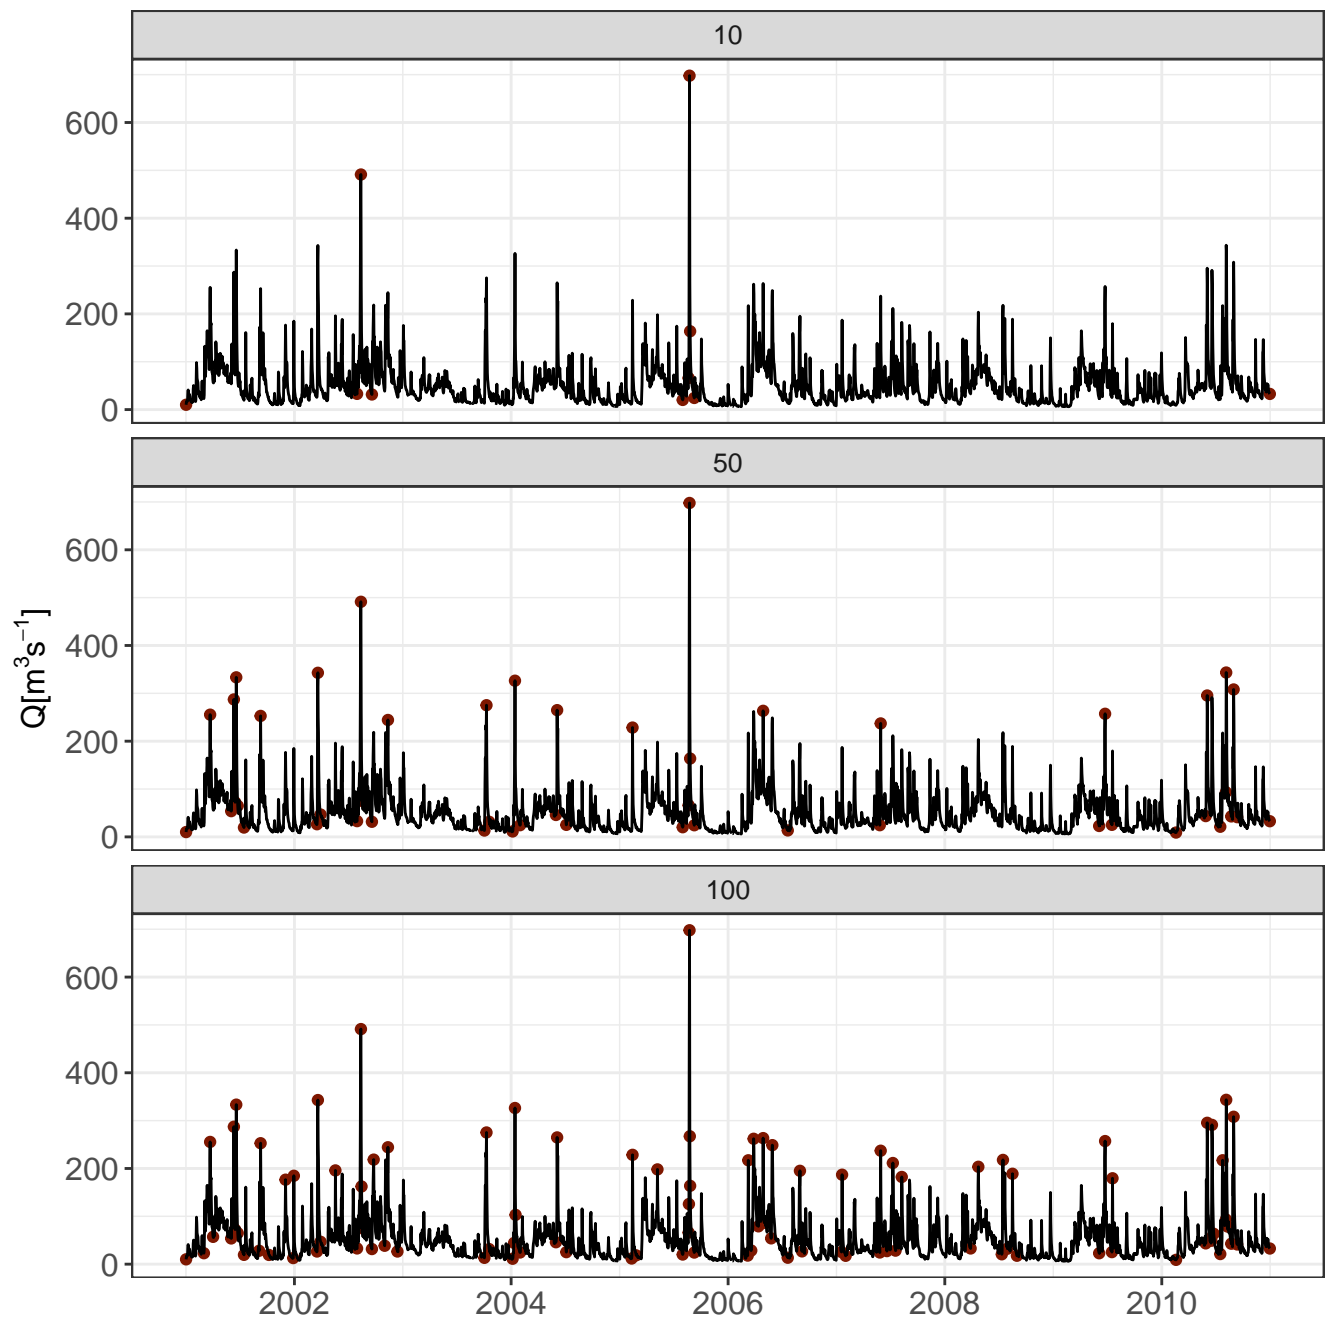

**Figure S1.** Douglas-Peucker sampling points for sample size 10, 50, and 100 for the training period of the Iller catchment.

#### **S4 Comparison learning curves using the Kling Gupta efficiency (KGE)**

Figure S2 compares the learning curves of the different data- and process-based models for the three study catchments Iller, Saale and Selke using the KGE as evaluation metric. Note that the learning curves are made for the validation period, not the calibration period.

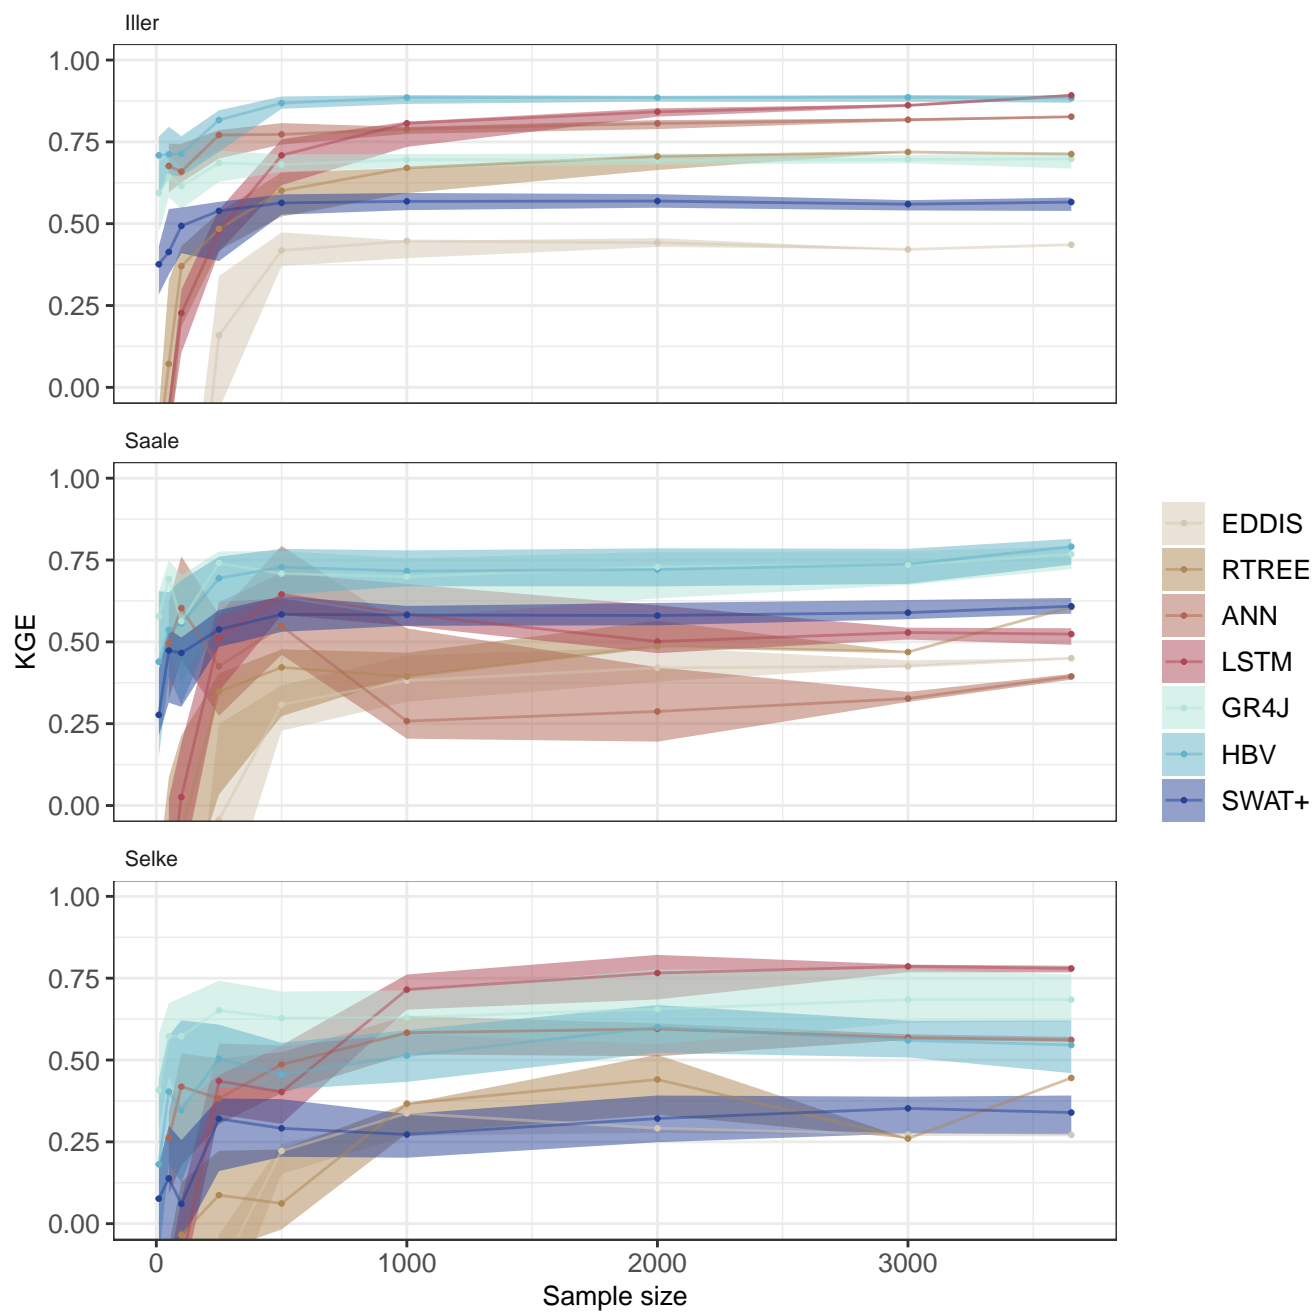

**Figure S2.** Learning curve using the continuous random sampling strategy for the different models and catchments, Kling Gupta efficiency, KGE. The closer the values to 1 the better the model performance.

**S5 Comparison sampling schemes using the Kling Gupta efficiency (KGE)**

Figure S3 compares the learning curves of the HBV model for three different sample schemes (optimal = Douglas-Peucker, random, random consecutive) for the three study catchments Iller, Saale and Selke using the KGE as evaluation metric. Note that the learning curves are made for the validation period, not the calibration period.

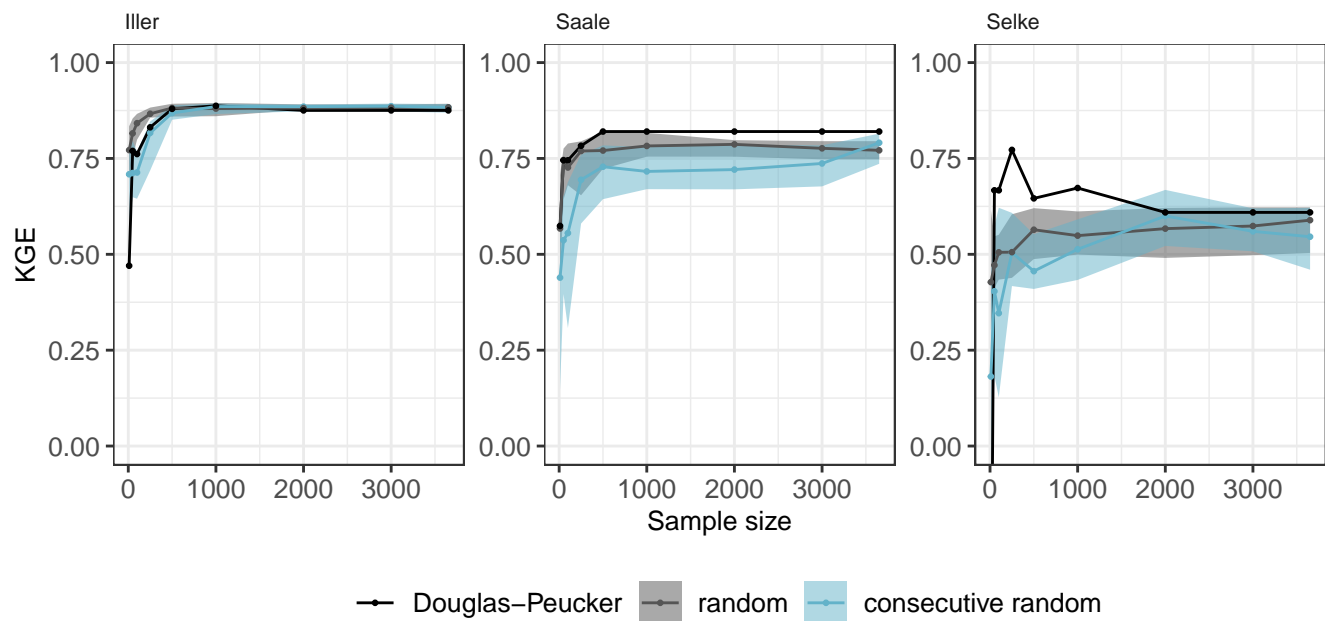

**Figure S3.** Learning curves using Kling Gupta efficiency, KGE. Three different sampling schemes are compared for the HBV model and for the three study catchments Iller, Saale and Selke. The closer the values to 1 the better the model performance.

**S6 Comparison model performance with different level of discretization of model forcing using the Kling Gupta efficiency (KGE)**

Figure S4 compares the KGE values when forcing the HBV model once with lumped and once with semi-distributed, i.e. sub-catchment wise, meteorological input for the three study catchments Iller, Saale and Selke.

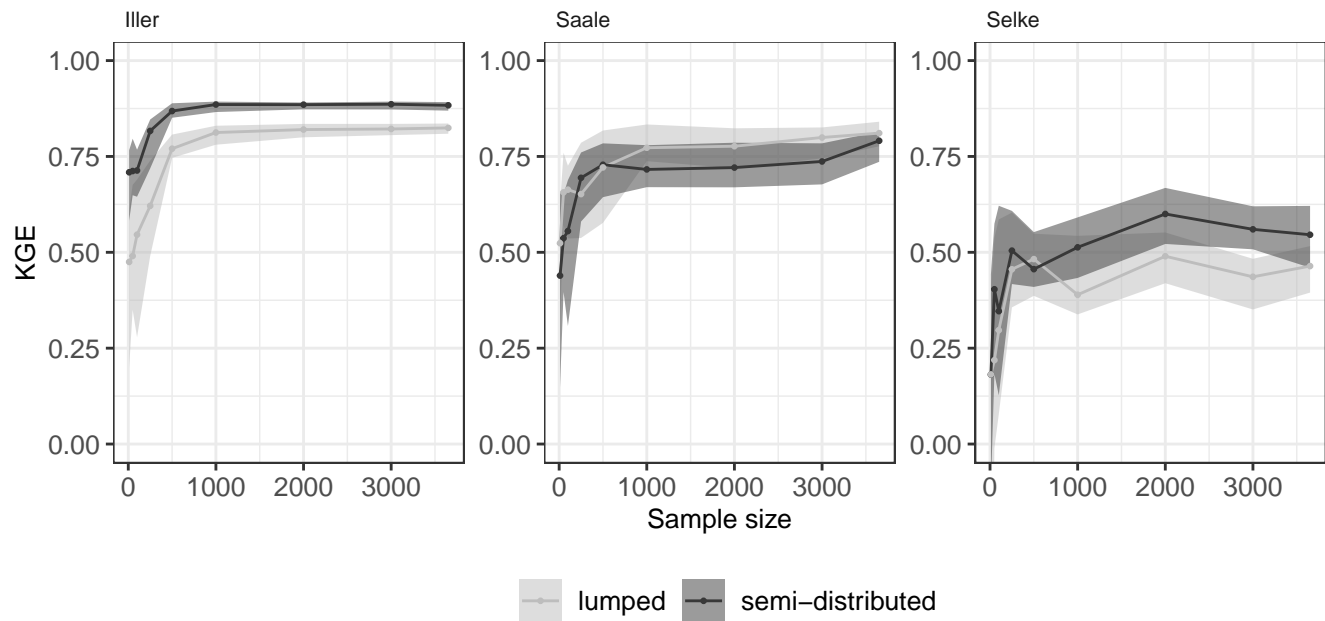

**Figure S4.** Learning curves using Kling Gupta efficiency, KGE. Lumped and distributed forcing are compared for the HBV model and for the three study catchments Iller, Saale and Selke. The closer the values to 1 the better the model performance.



## **S7 Examples of observed and simulated hydrographs**

### **S7.1 Process-based models**

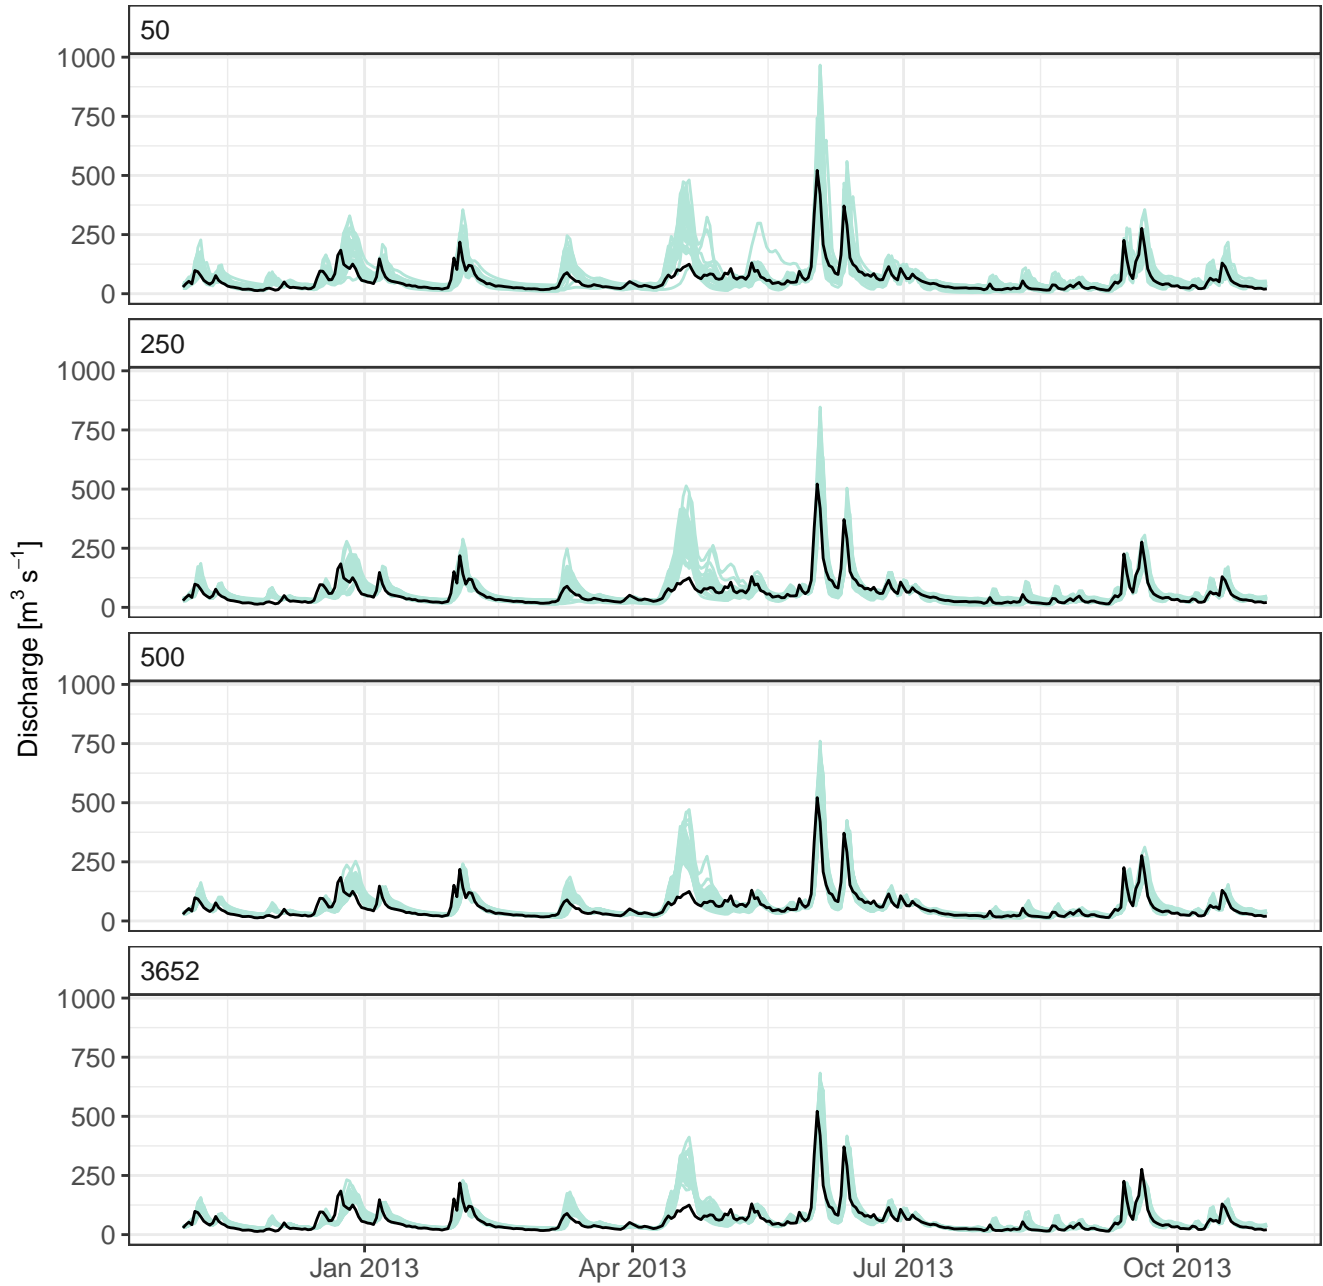

**Figure S5.** Hydrograph of the Iller at Wiblingen for the hydrological year 2013 (i.e. during validation) for three different sample sizes and all 30 repetitions for the GR4J model

## S7.2 Data-driven models

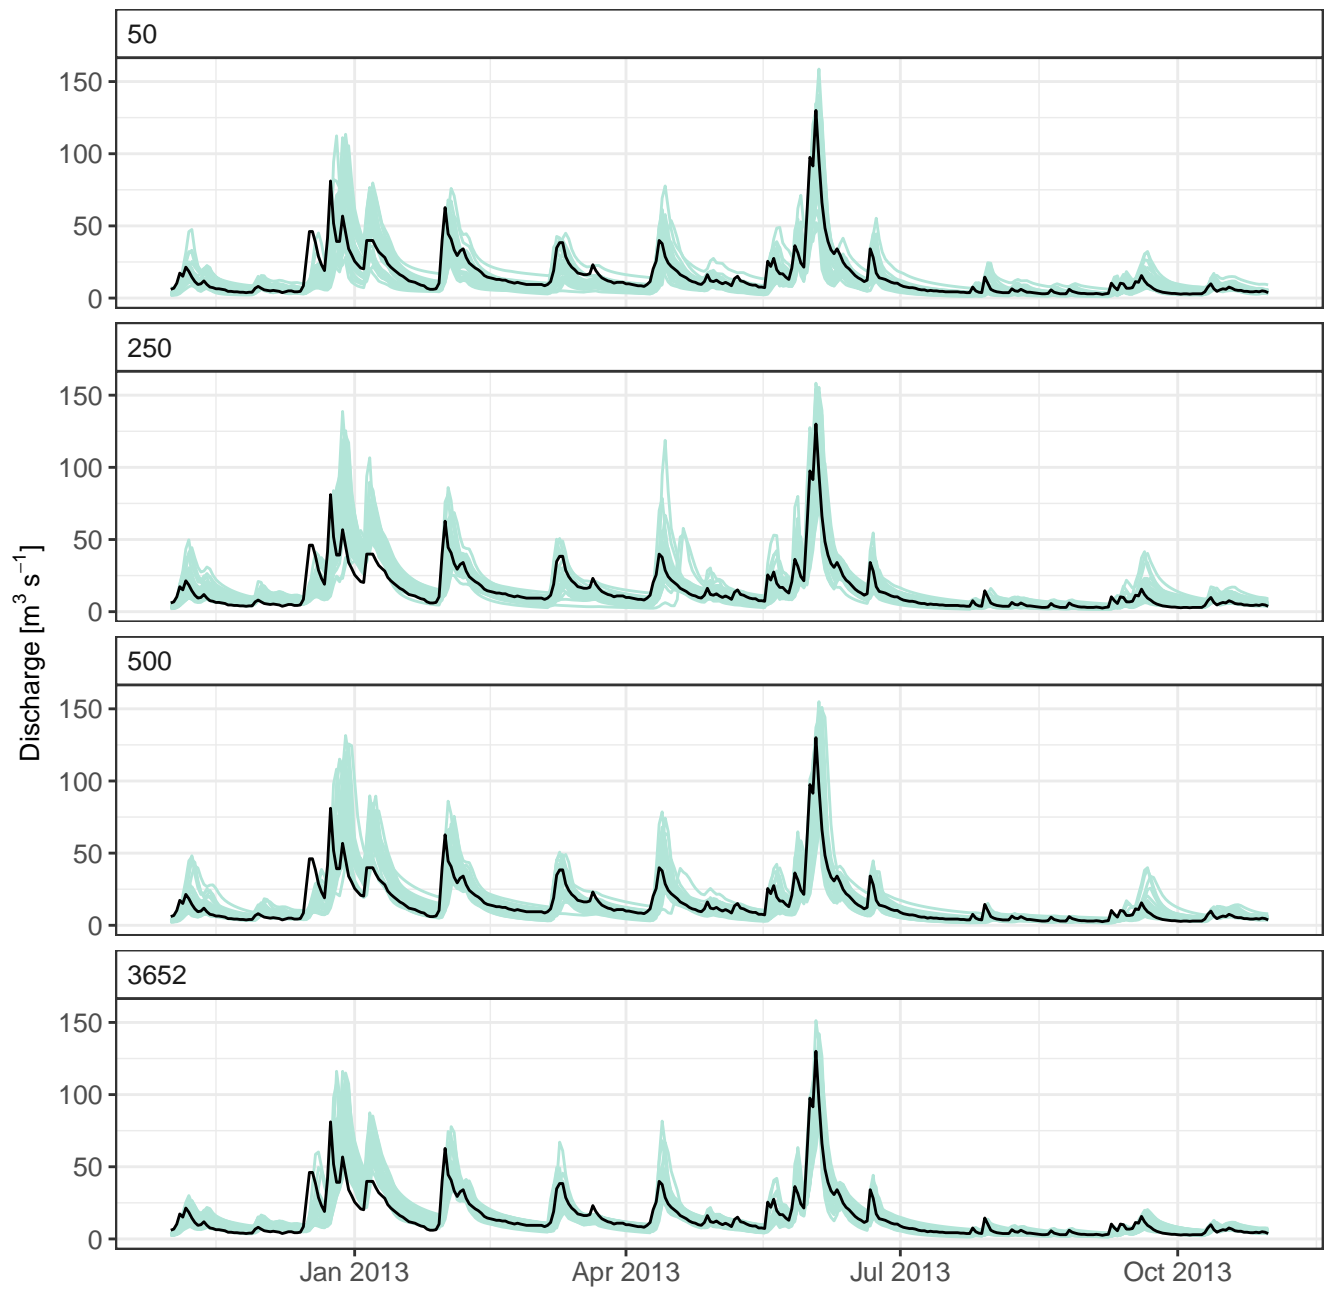

**Figure S6.** Hydrograph of the Saale at Blankenstein for the hydrological year 2013 (i.e. during validation) for four different sample sizes and all 30 repetitions for the GR4J model

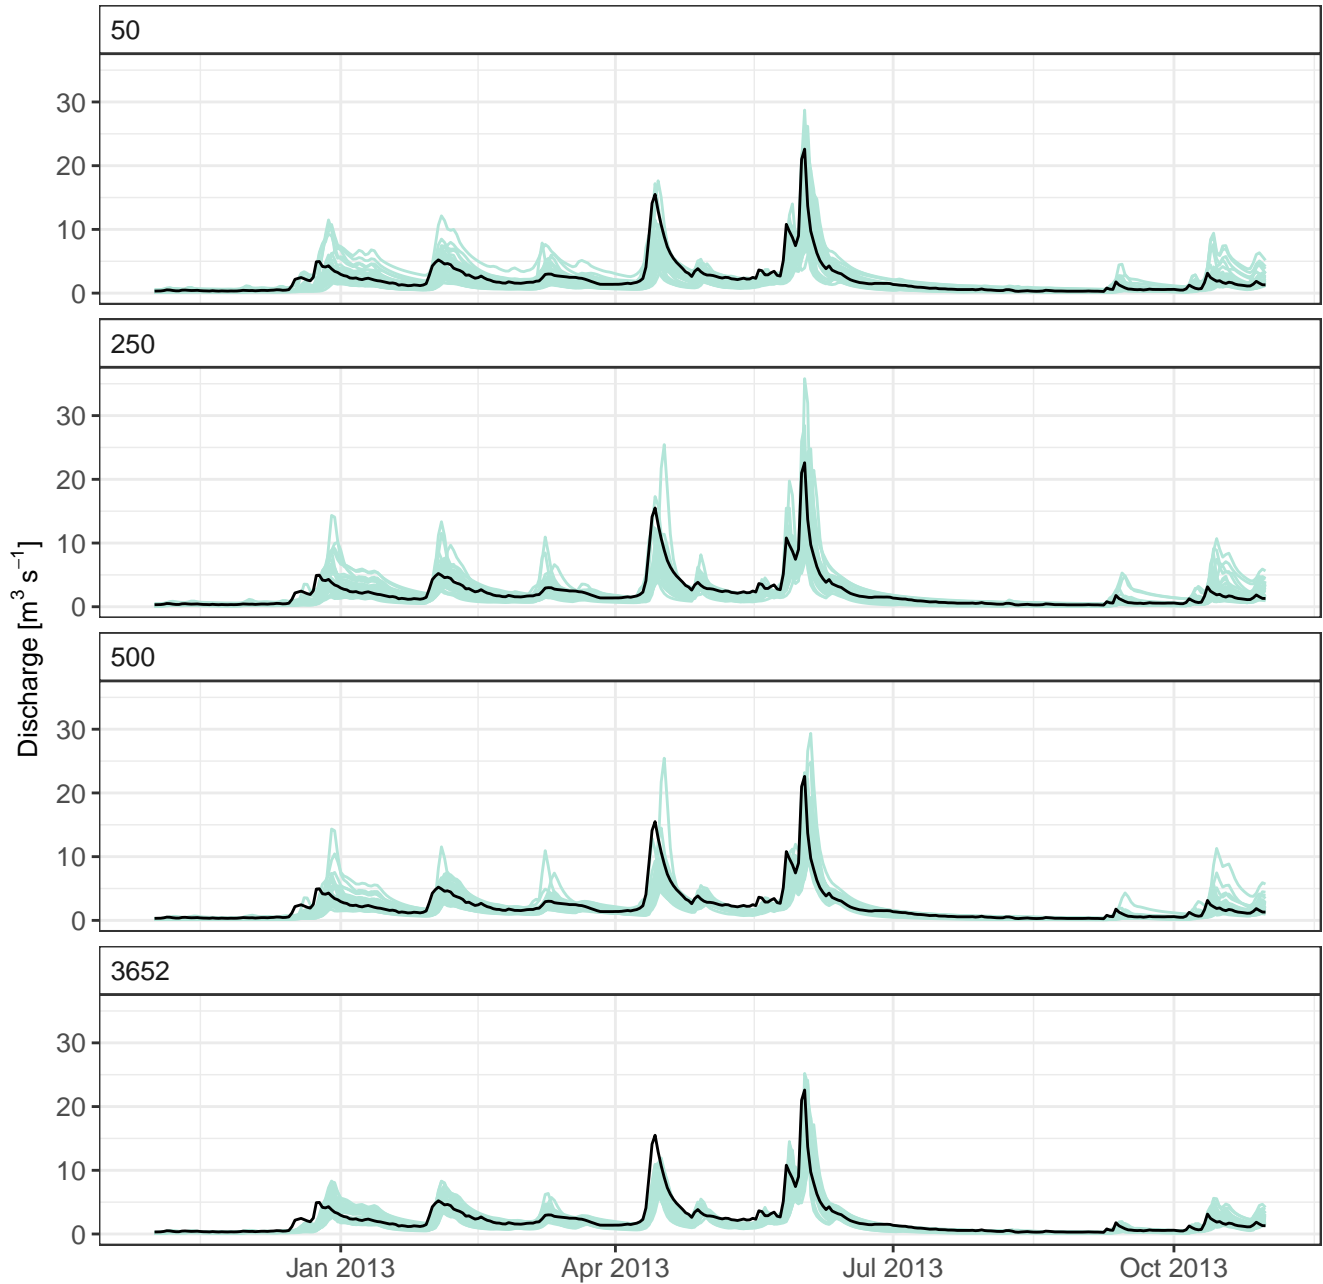

**Figure S7.** Hydrograph of the Selke at Hausneindorf for the hydrological year 2013 (i.e. during validation) for four different sample sizes and all 30 repetitions for the GR4J model

## References

Duan, Q., Sorooshian, S., and Gupta, V.: Effective and efficient global optimization for conceptual rainfall-runoff models, *Water Resources Research*, 28, 1015–1031, <https://doi.org/10.1029/91WR02985>, 1992.

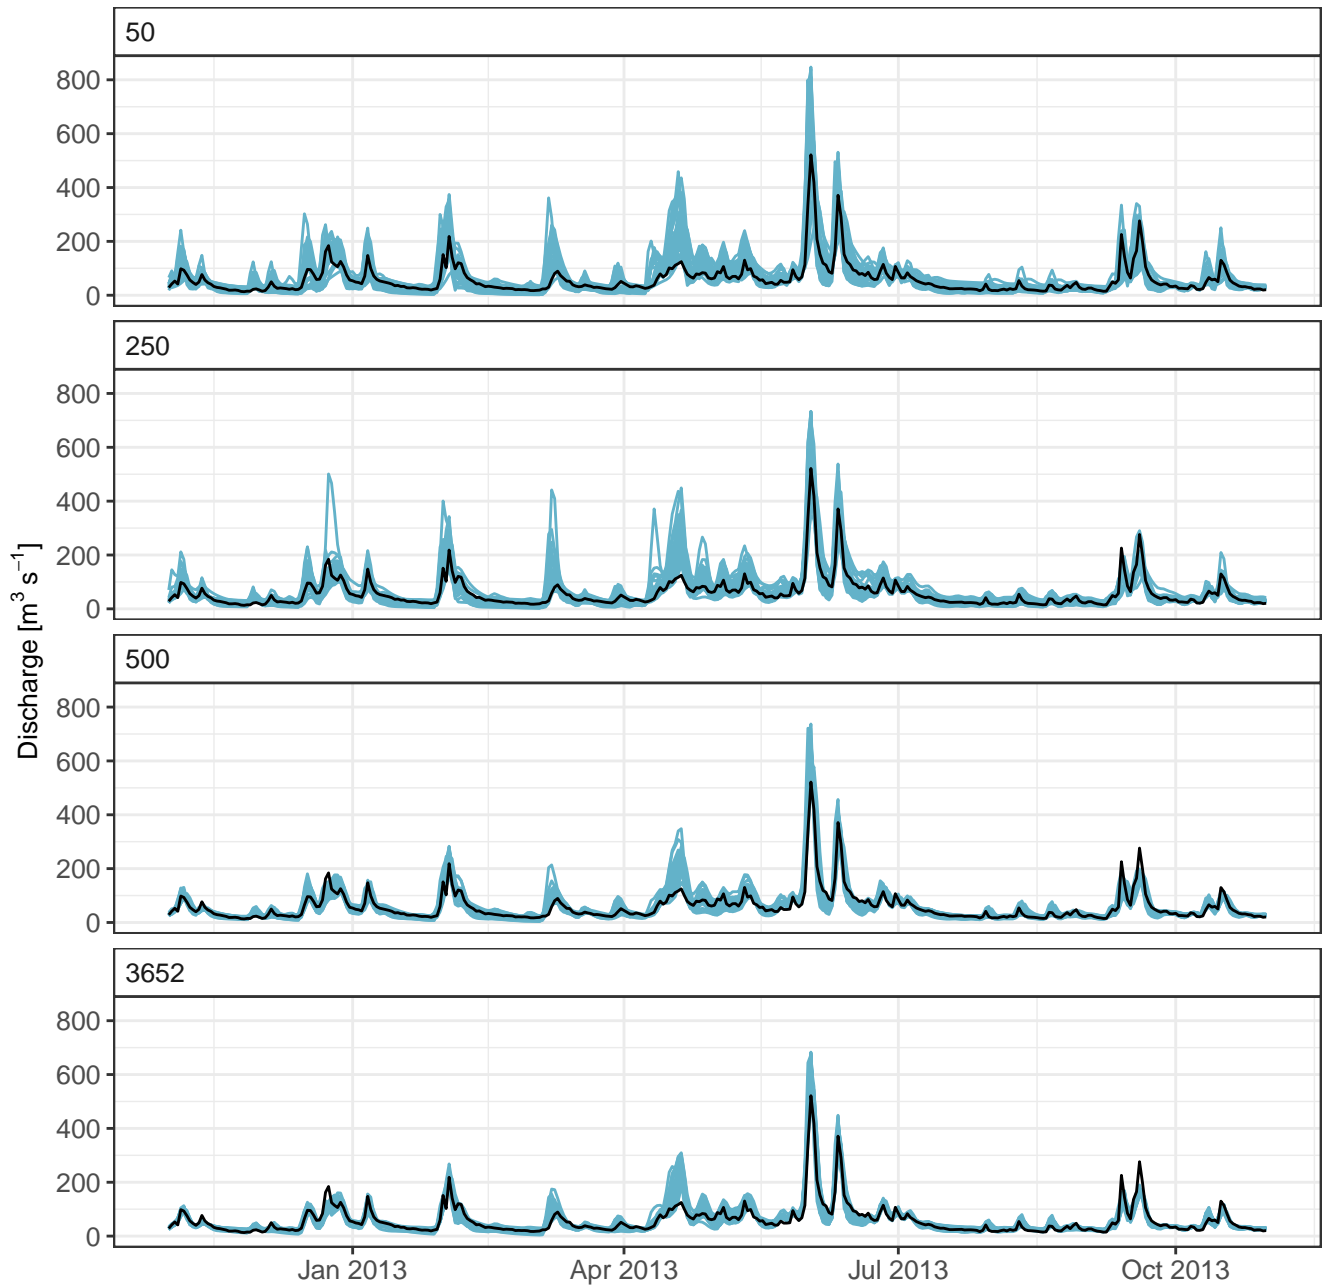

**Figure S8.** Hydrograph of the Iller at Wiblingen for the hydrological year 2013 (i.e. during validation) for four different sample sizes and all 30 repetitions for the HBV model

Houska, T., Kraft, P., Chamorro-Chavez, A., and Breuer, L.: SPOTting Model Parameters Using a Ready-Made Python Package, PLOS ONE, 10, 1–22, <https://doi.org/10.1371/journal.pone.0145180>, 2015.

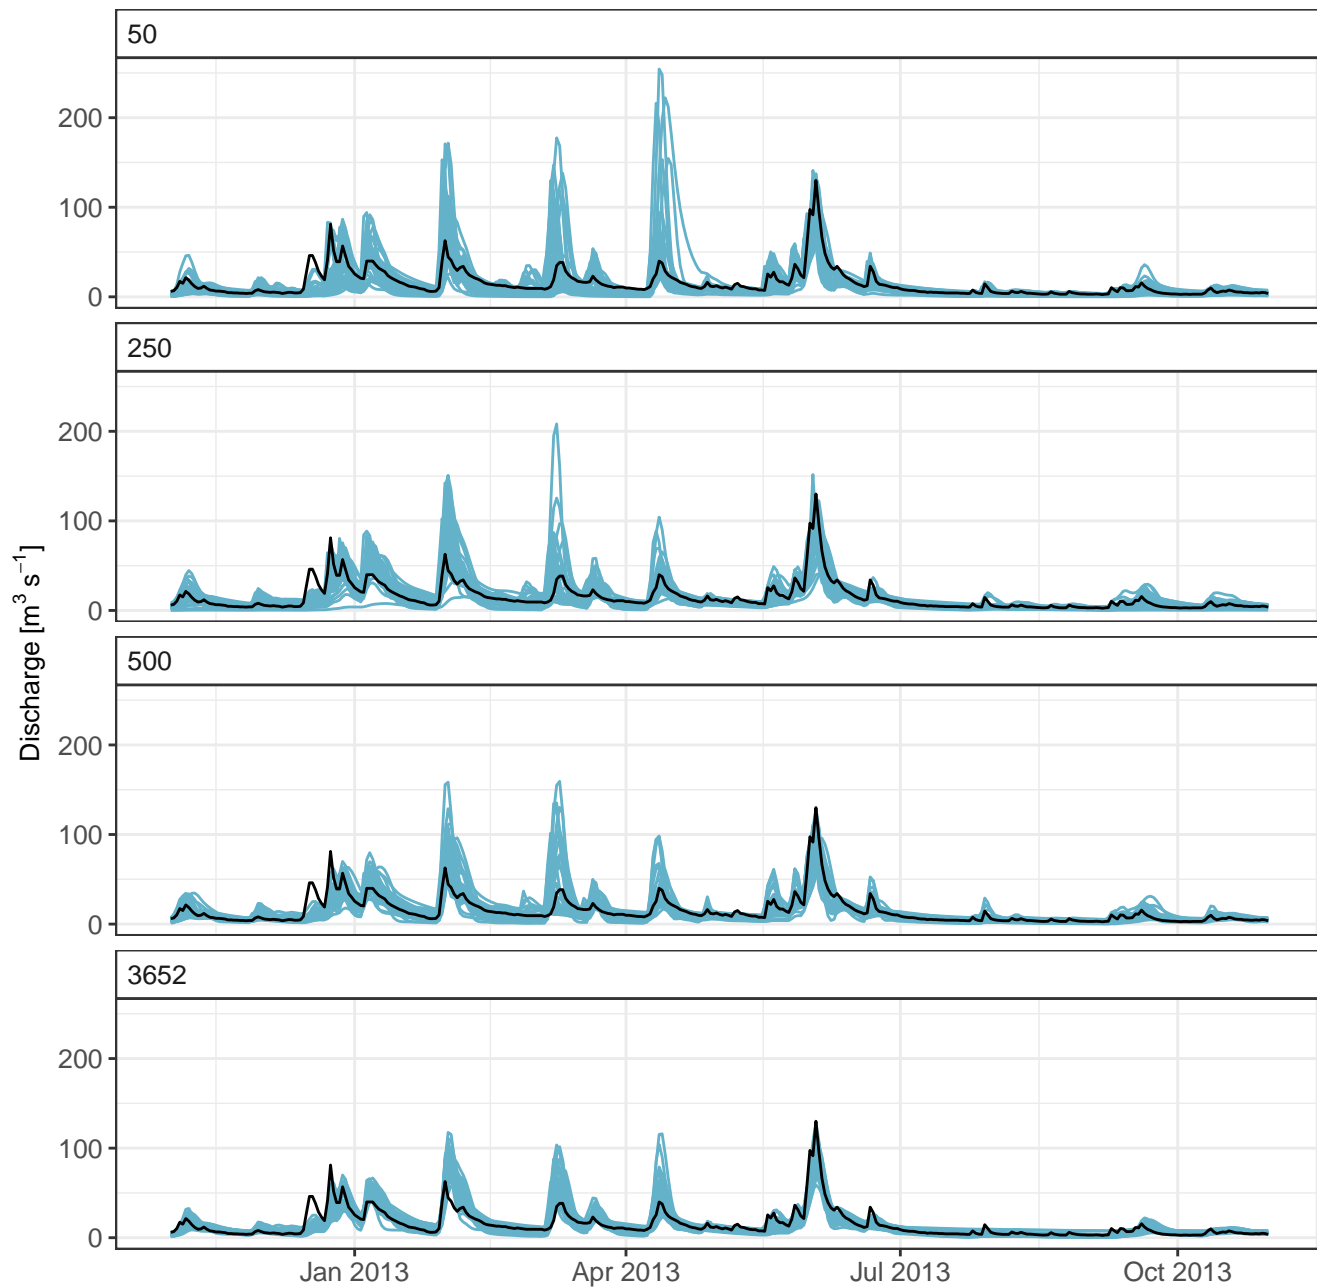

**Figure S9.** Hydrograph of the Saale at Blankenstein for the hydrological year 2013 (i.e. during validation) for four different sample sizes and all 30 repetitions for the HBV model

Tolson, B. A. and Shoemaker, C. A.: Dynamically dimensioned search algorithm for computationally efficient watershed model calibration, *Water Resources Research*, 43, <https://doi.org/10.1029/2005WR004723>, cited by: 592, 2007.

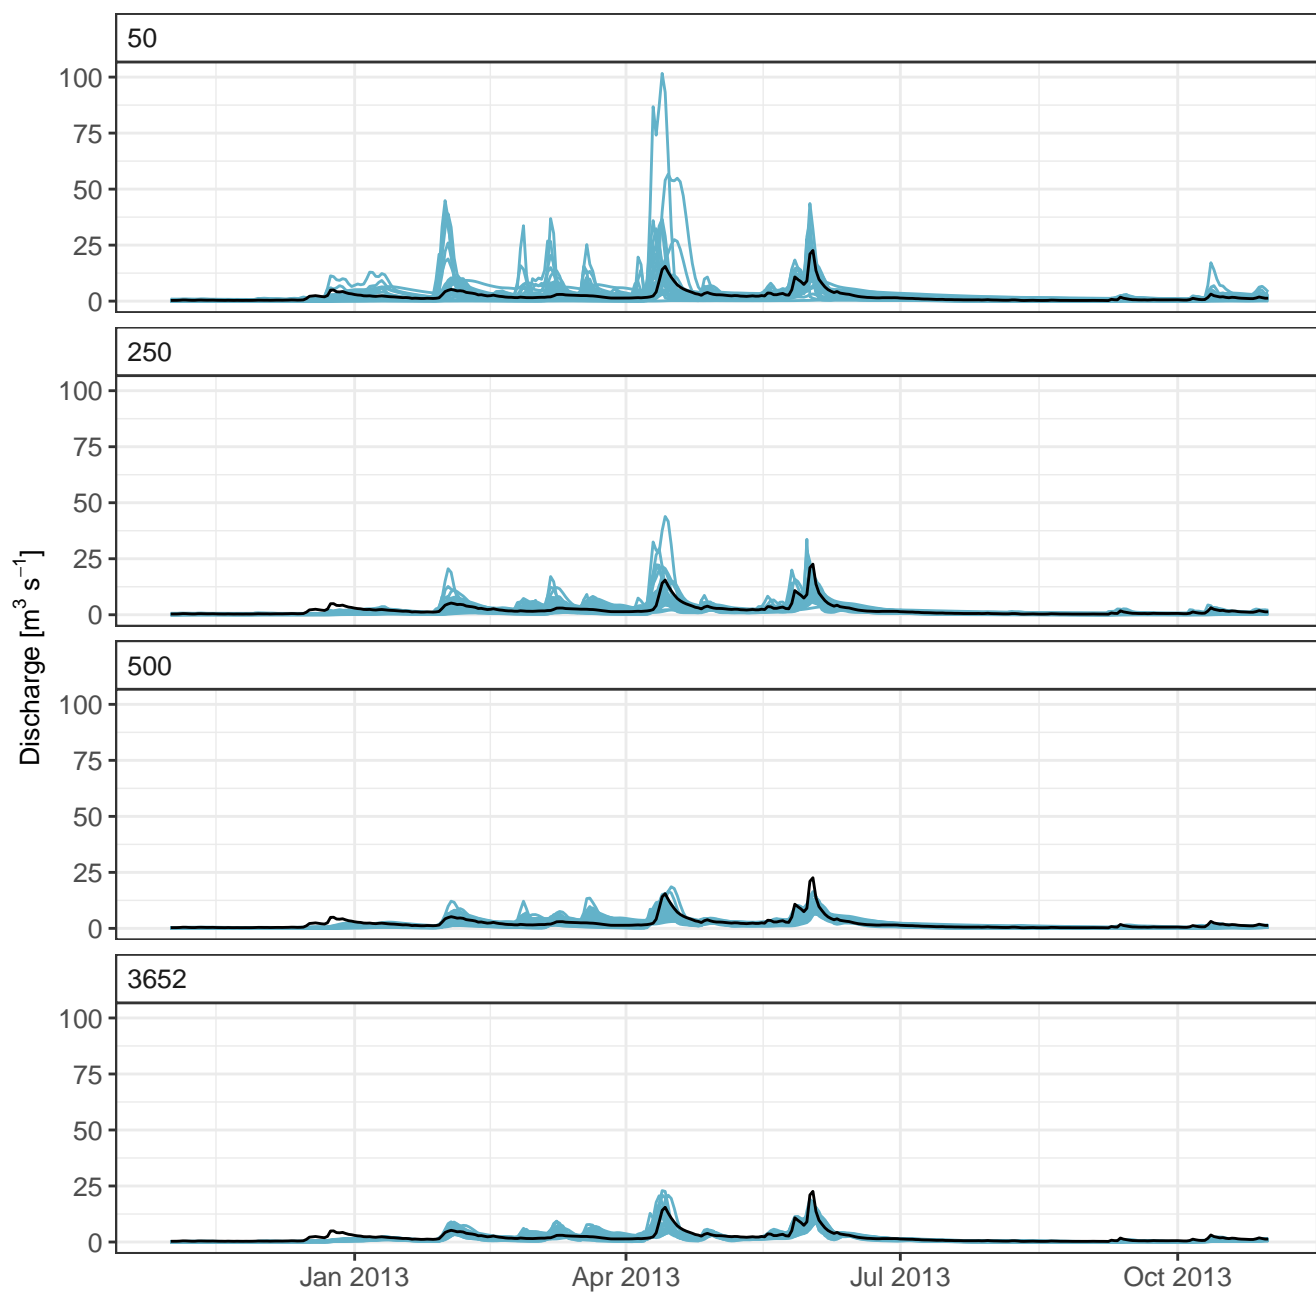

**Figure S10.** Hydrograph of the Selke at Hausneindorf for the hydrological year 2013 (i.e. during validation) for four different sample sizes and all 30 repetitions for the HBV model

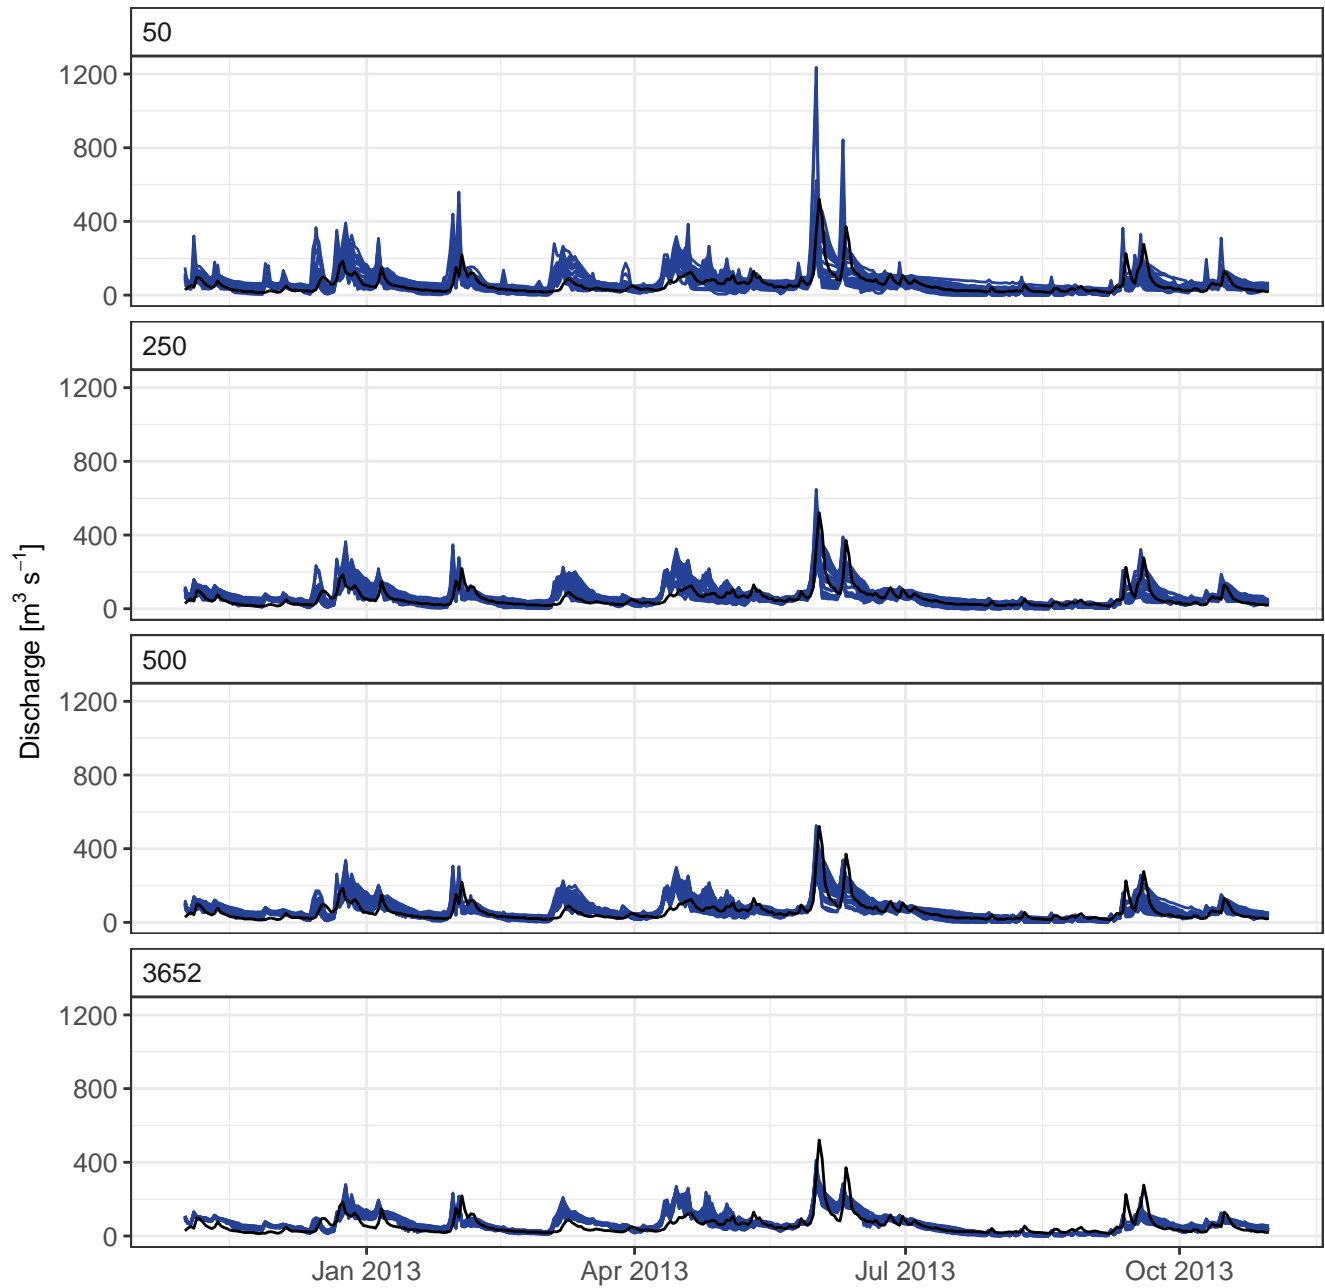

**Figure S11.** Hydrograph of the Iller at Wiblingen for the hydrological year 2013 (i.e. during validation) for four different sample sizes and all 30 repetitions for the SWAT+ model



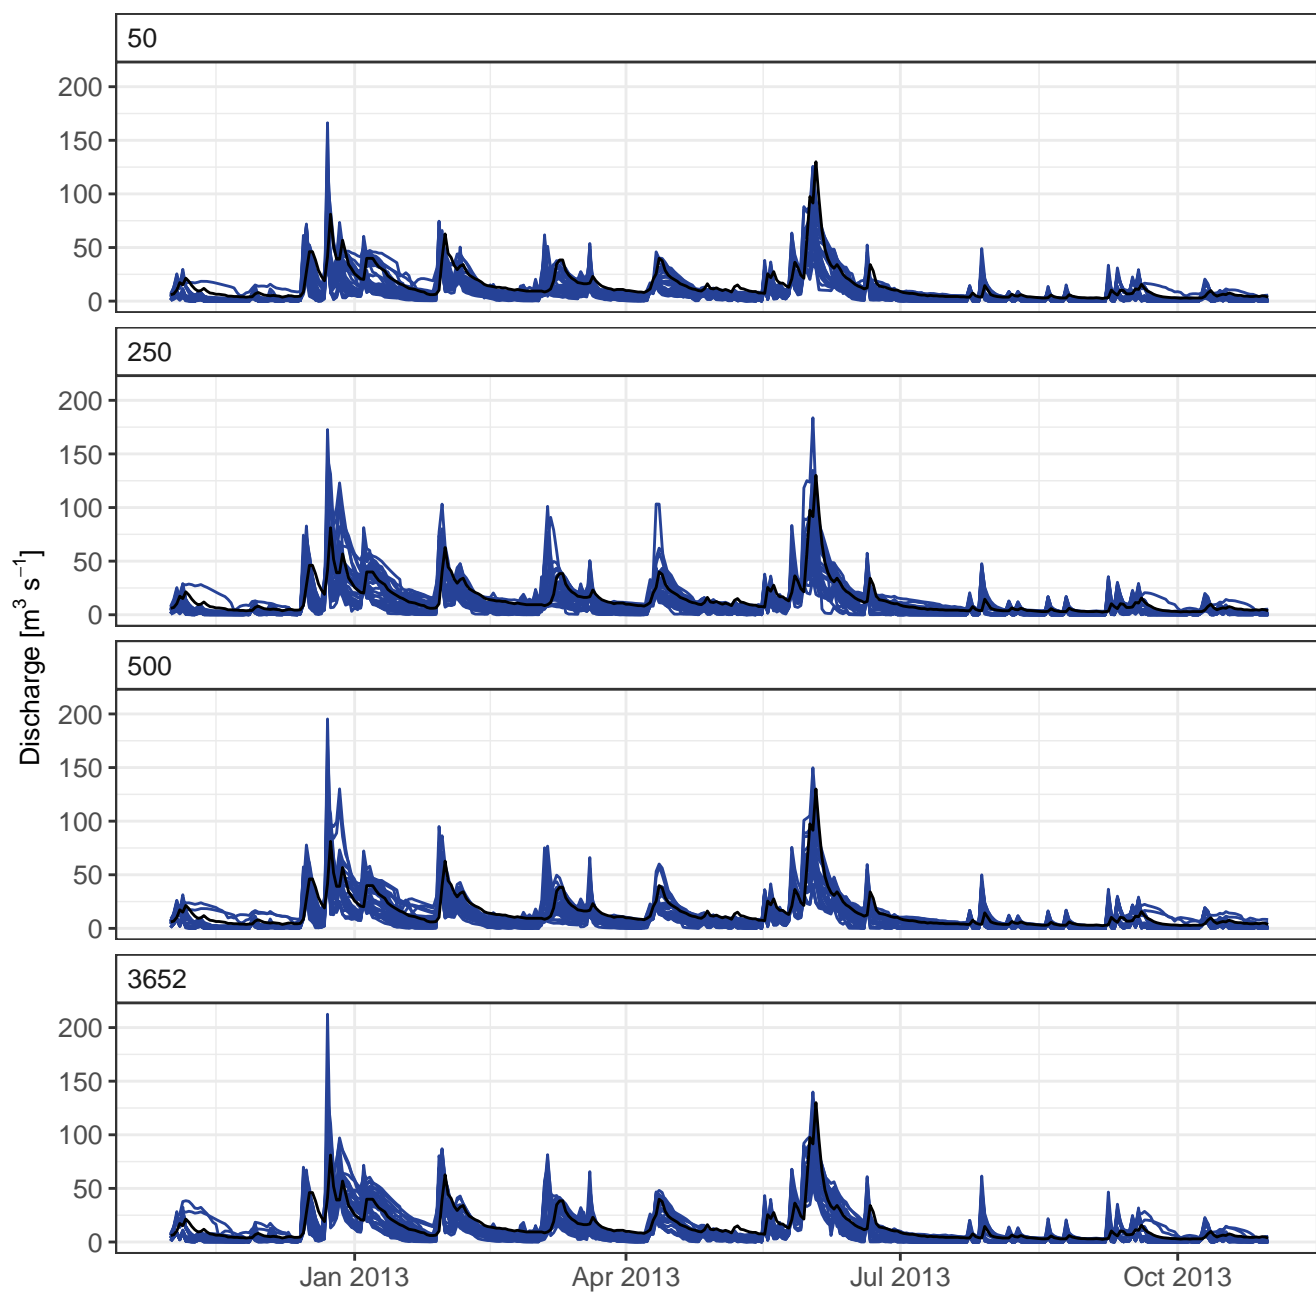

**Figure S12.** Hydrograph of the Saale at Blankenstein for the hydrological year 2013 (i.e. during validation) for four different sample sizes and all 30 repetitions for the SWAT+ model

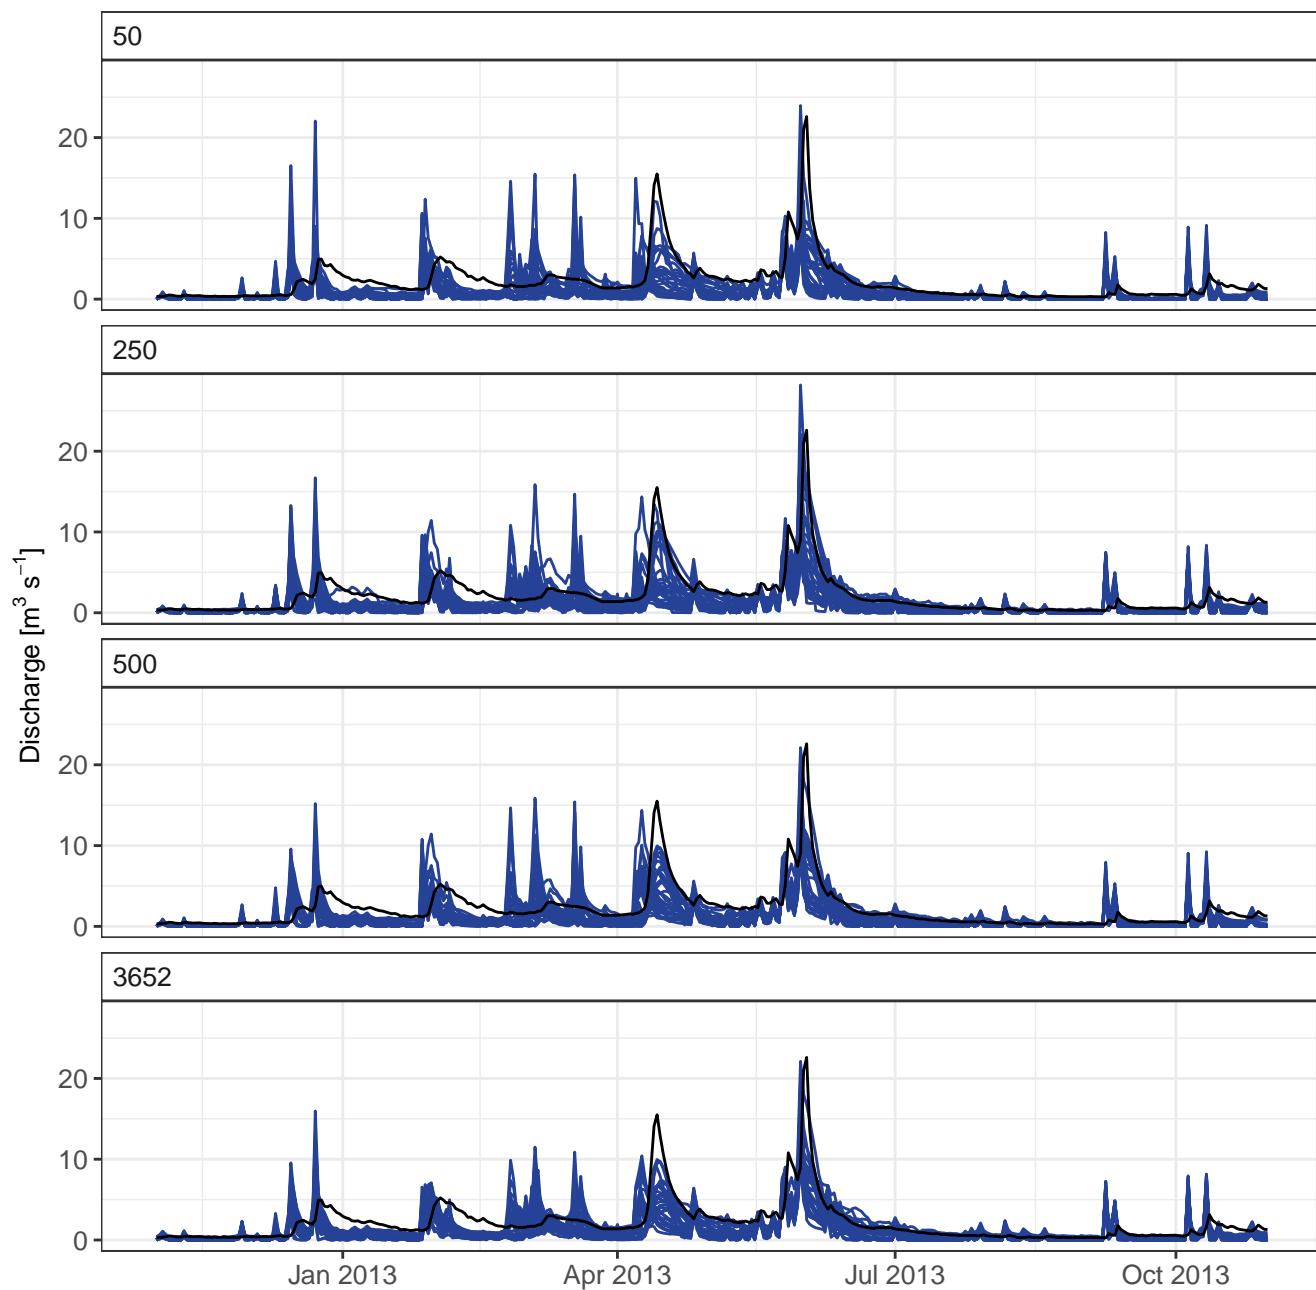

**Figure S13.** Hydrograph of the Selke at Hausneindorf for the hydrological year 2013 (i.e. during validation) for four different sample sizes and all 30 repetitions for the SWAT+ model

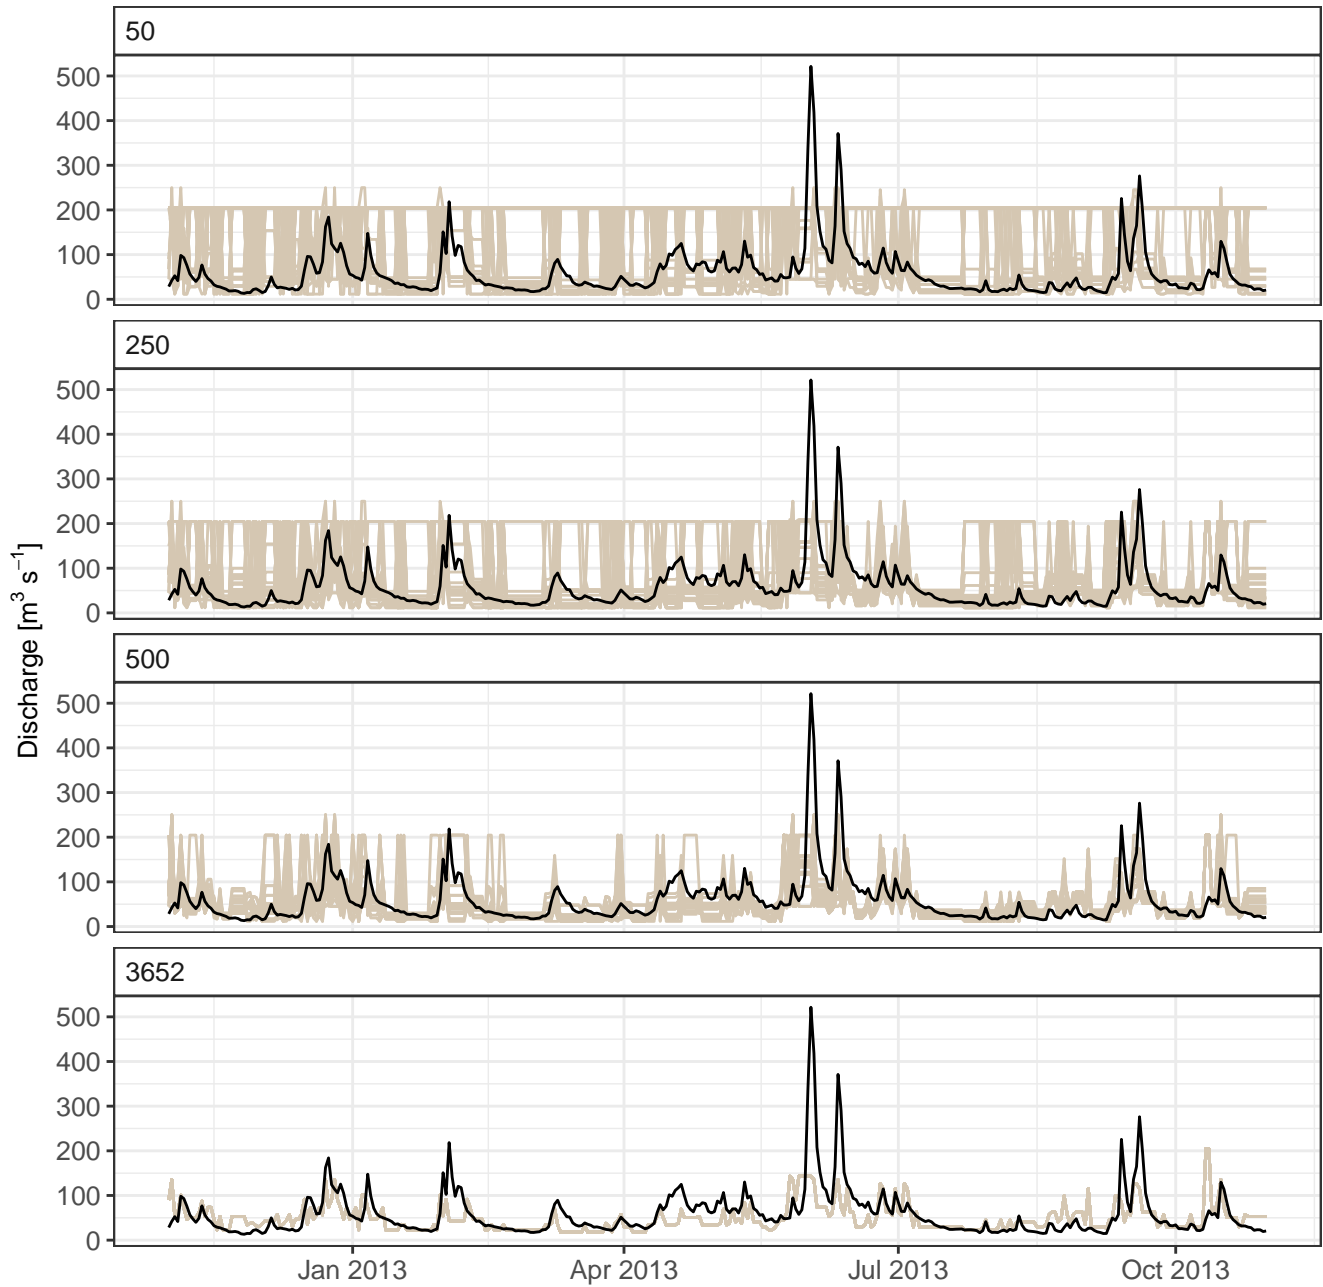

**Figure S14.** Hydrograph of the Iller at Wiblingen for the hydrological year 2013 (i.e. during validation) for four different sample sizes and all 30 repetitions for the EDDIS model

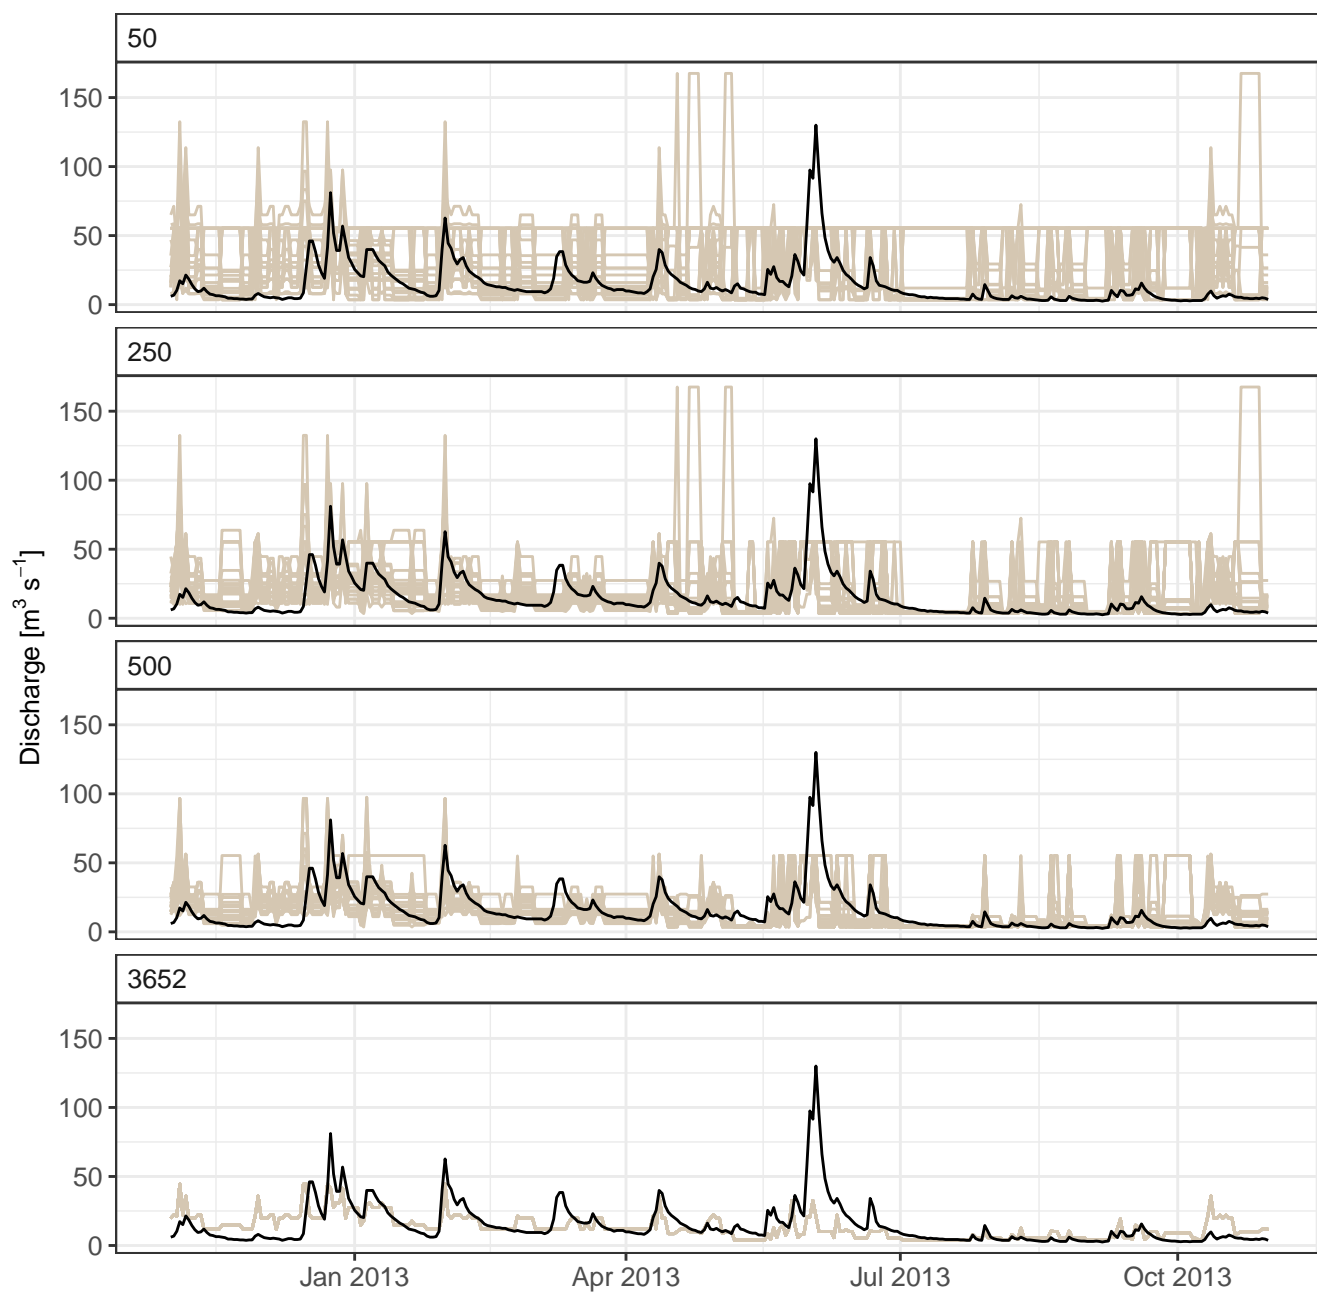

**Figure S15.** Hydrograph of the Saale at Blankenstein for the hydrological year 2013 (i.e. during validation) for four different sample sizes and all 30 repetitions for the EDDIS model

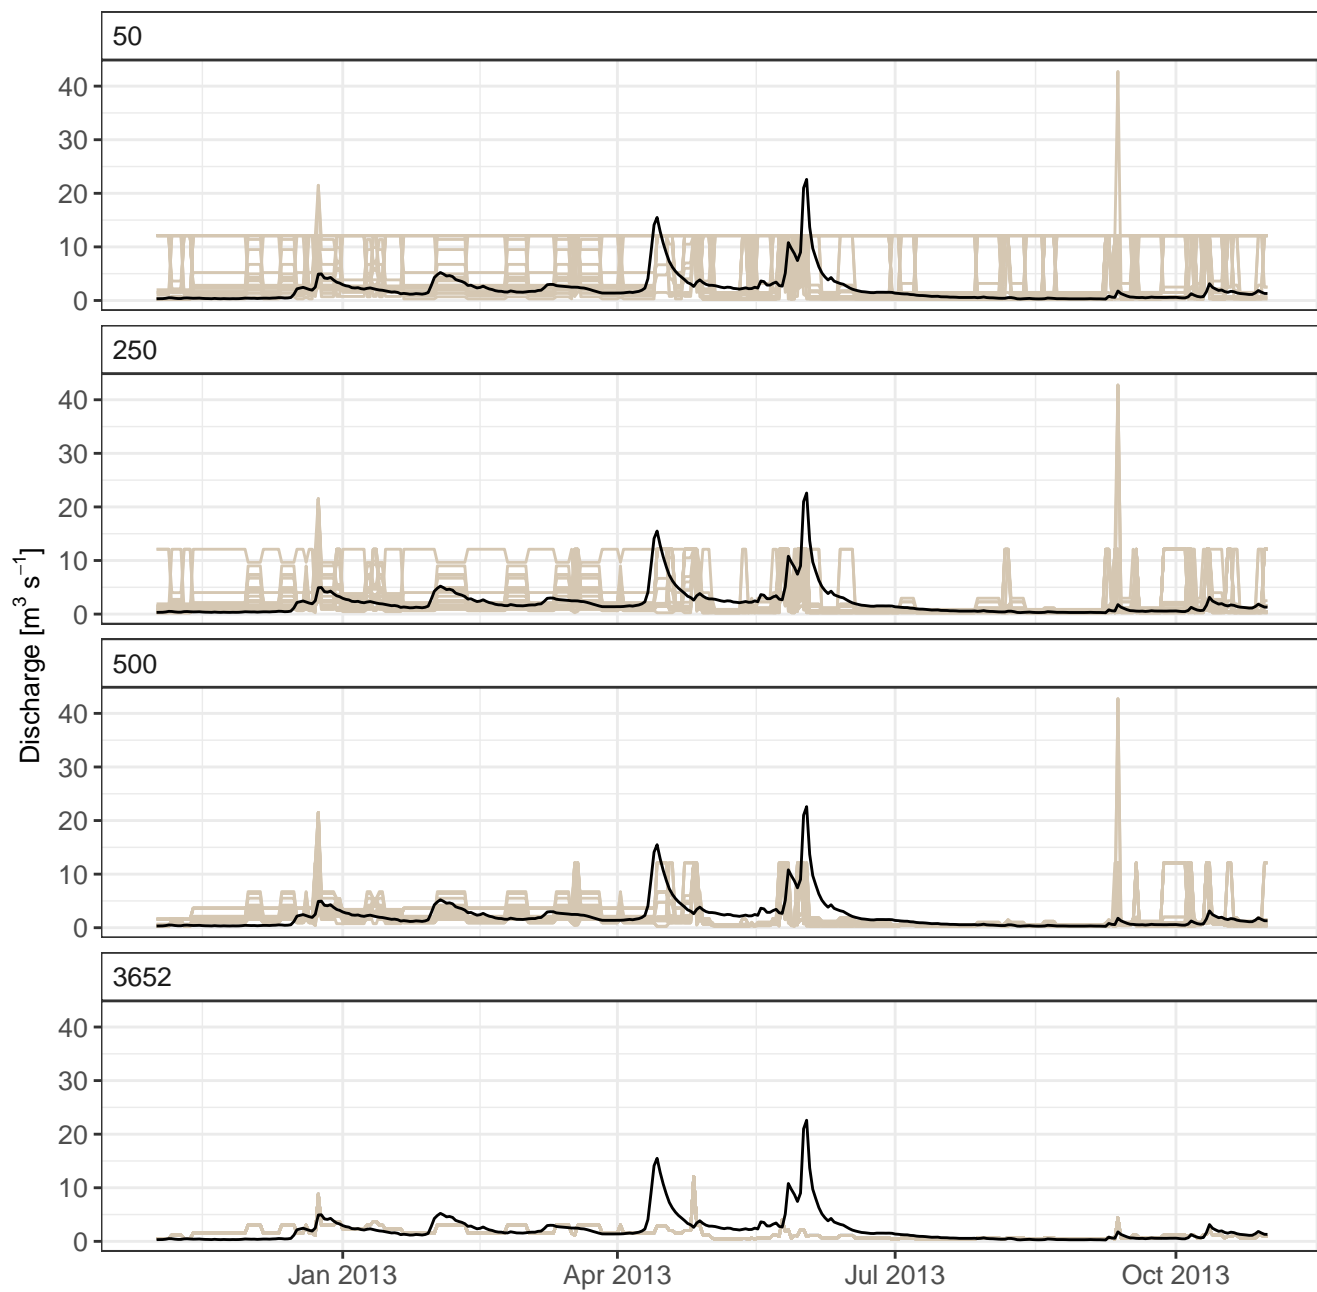

**Figure S16.** Hydrograph of the Selke at Hausneindorf for the hydrological year 2013 (i.e. during validation) for four different sample sizes and all 30 repetitions for the EDDIS model

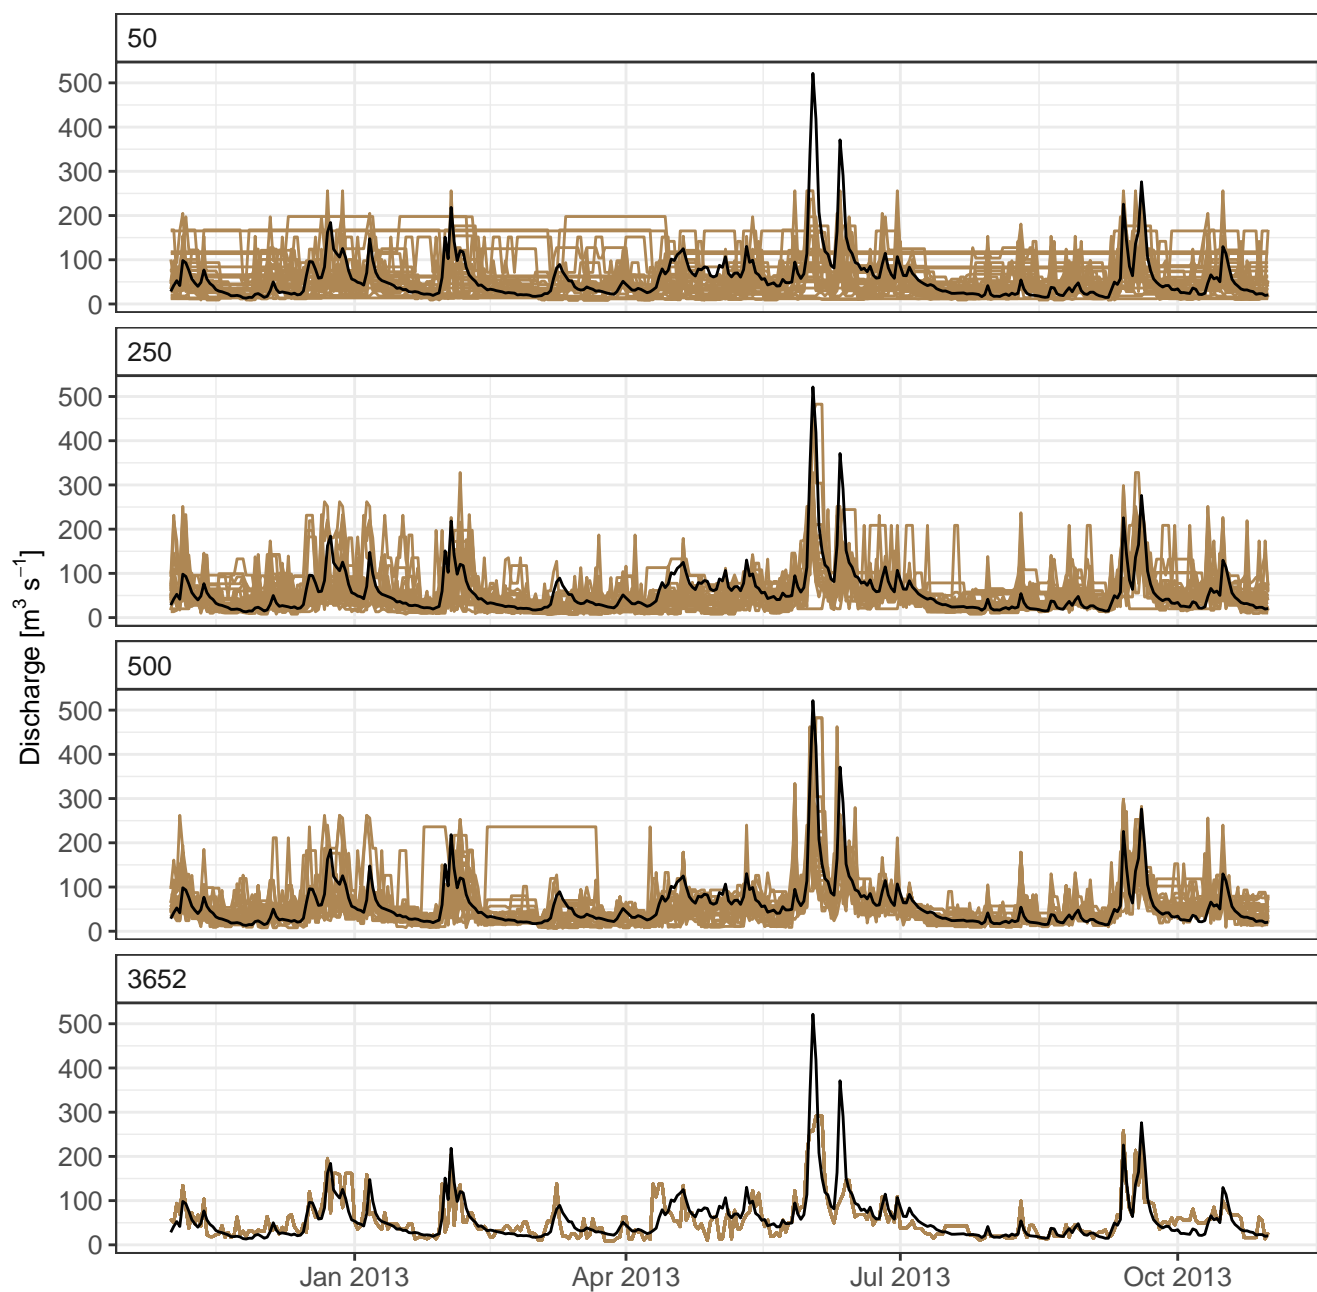

**Figure S17.** Hydrograph of the Iller at Wiblingen for the hydrological year 2013 (i.e. during validation) for four different sample sizes and all 30 repetitions for the RTREE model

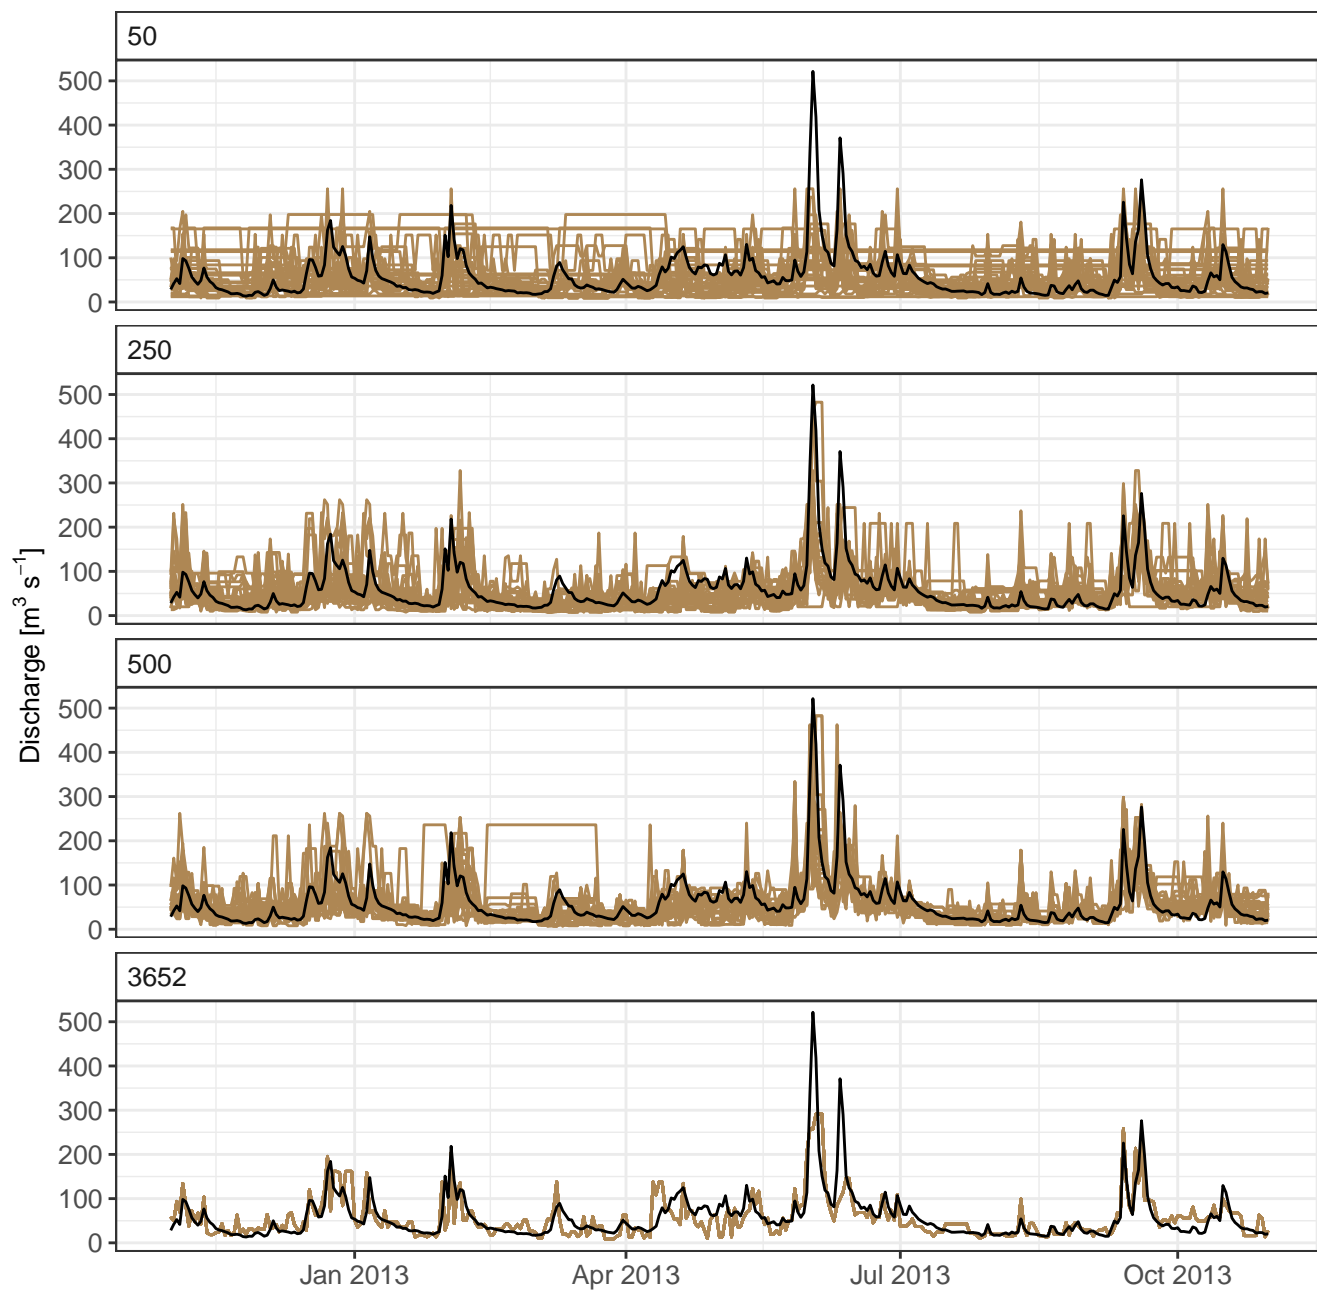

**Figure S18.** Hydrograph of the Saale at Blankenstein for the hydrological year 2013 (i.e. during validation) for four different sample sizes and all 30 repetitions for the RTREE model

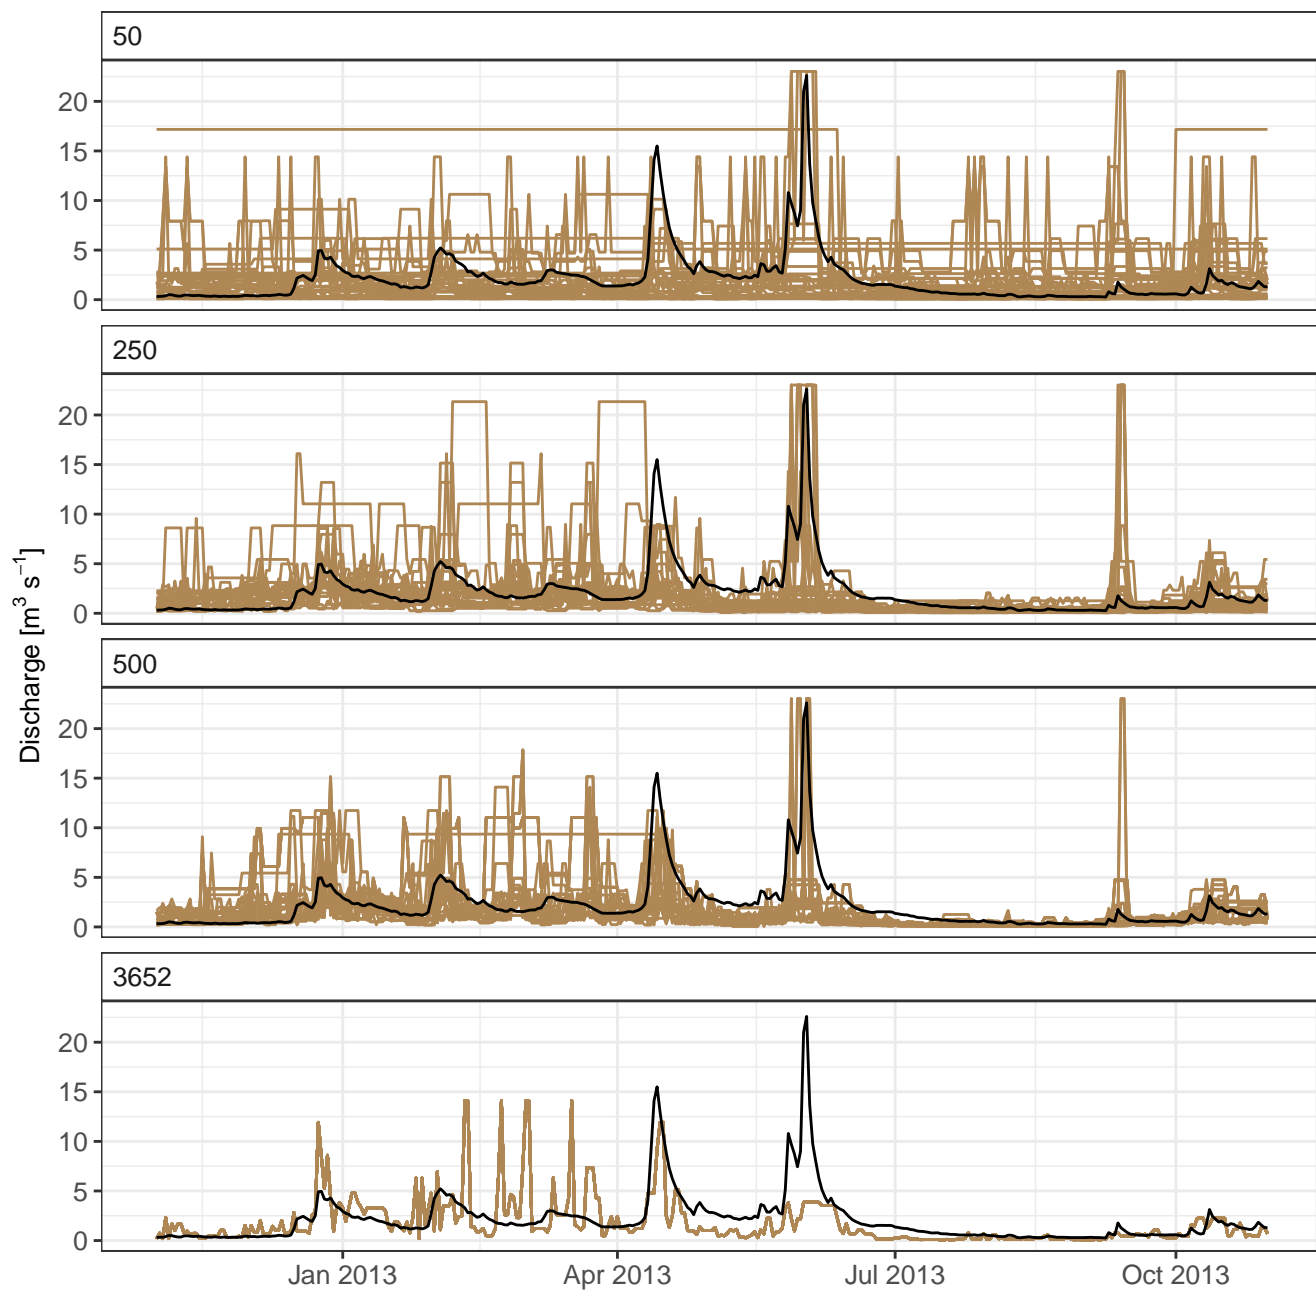

**Figure S19.** Hydrograph of the Selke at Hausneindorf for the hydrological year 2013 (i.e. during validation) for four different sample sizes and all 30 repetitions for the RTREE model



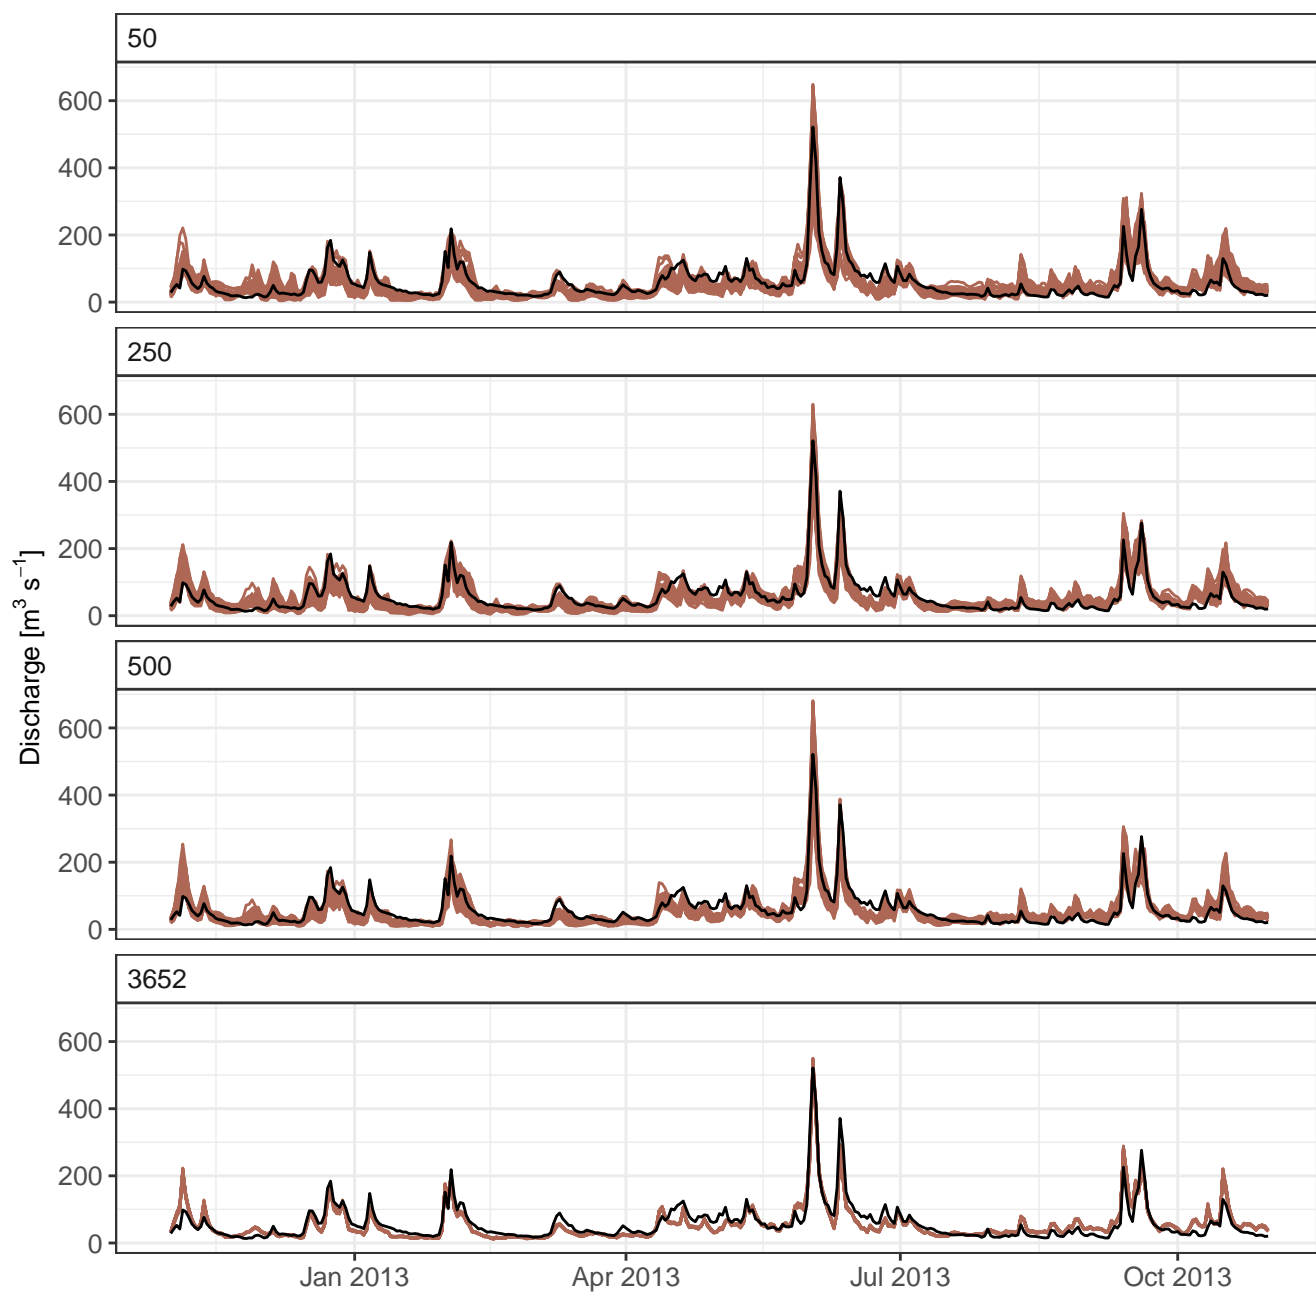

**Figure S20.** Hydrograph of the Iller at Wiblingen for the hydrological year 2013 (i.e. during validation) for four different sample sizes and all 30 repetitions for the ANN model

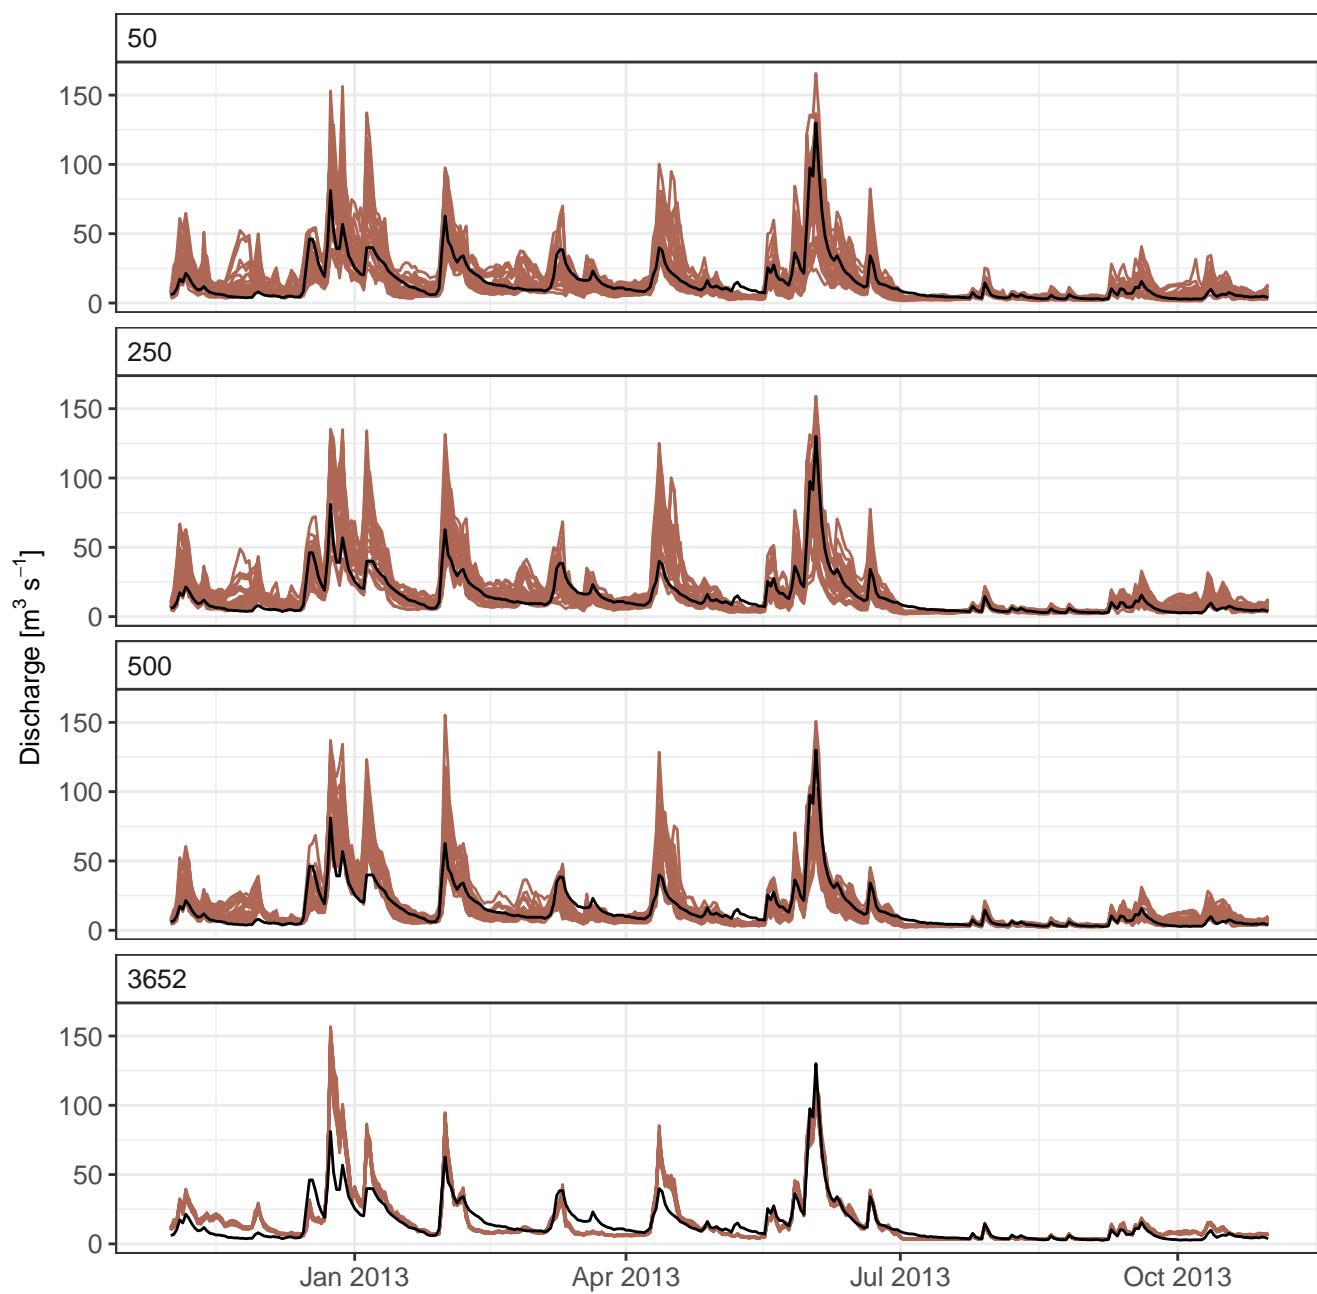

**Figure S21.** Hydrograph of the Saale at Blankenstein for the hydrological year 2013 (i.e. during validation) for four different sample sizes and all 30 repetitions for the ANN model

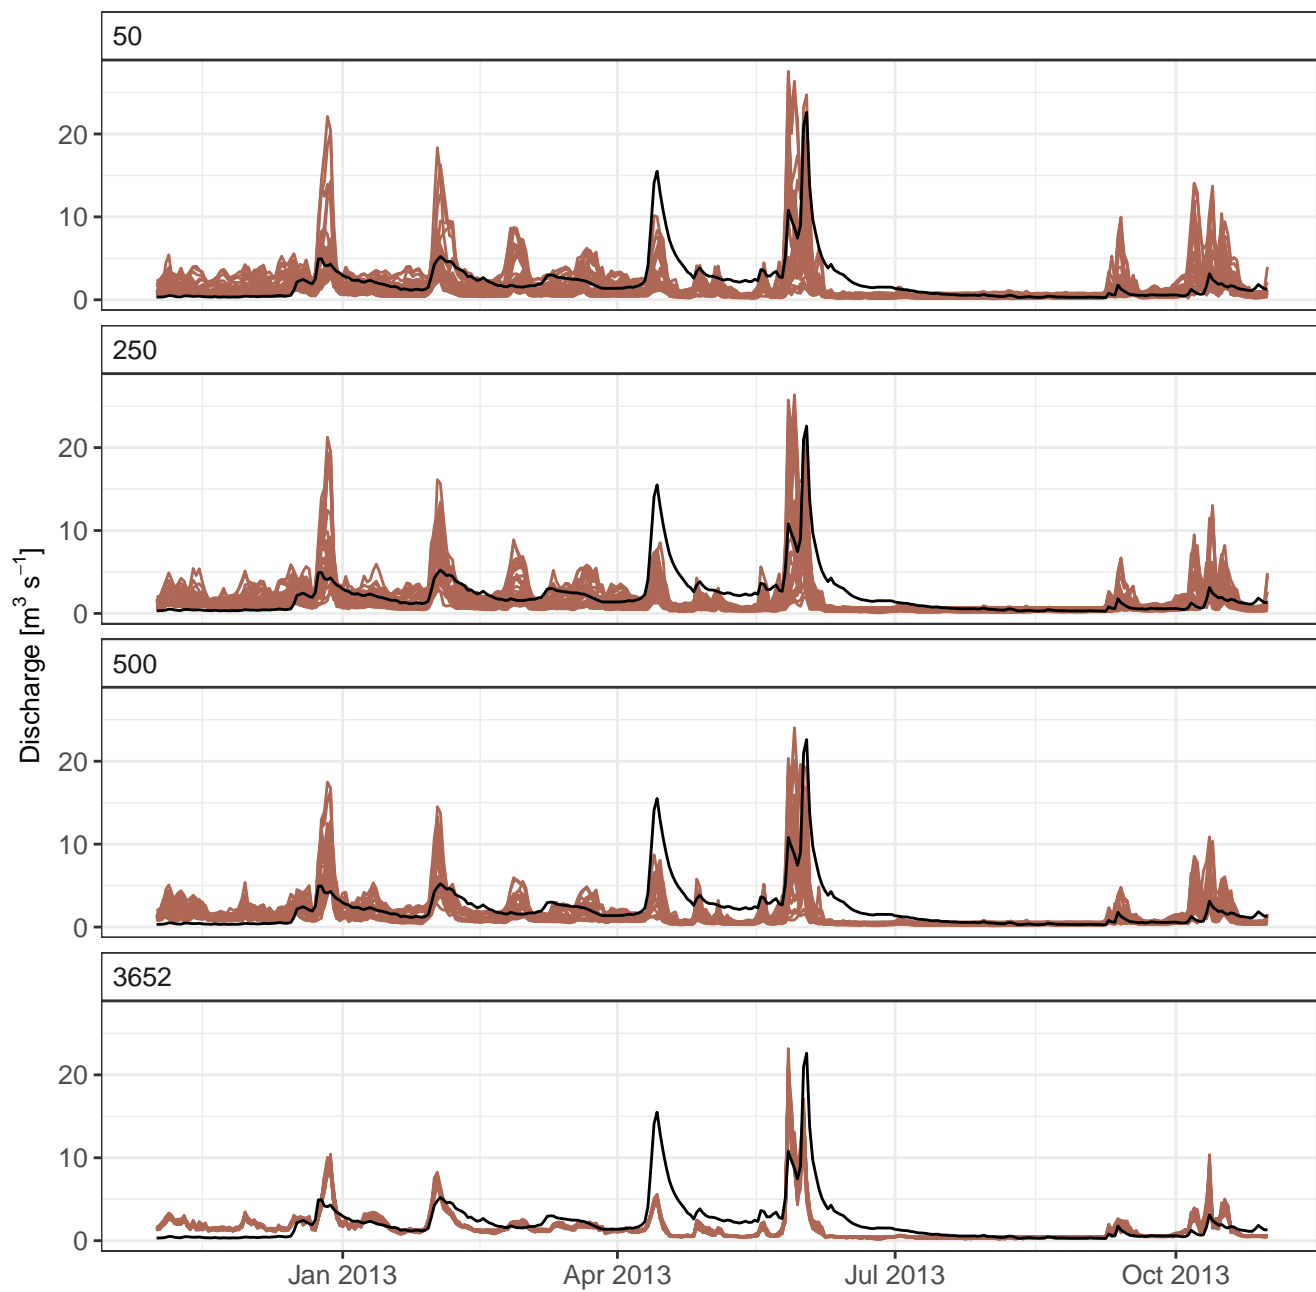

**Figure S22.** Hydrograph of the Selke at Hausneindorf for the hydrological year 2013 (i.e. during validation) for four different sample sizes and all 30 repetitions for the ANN model

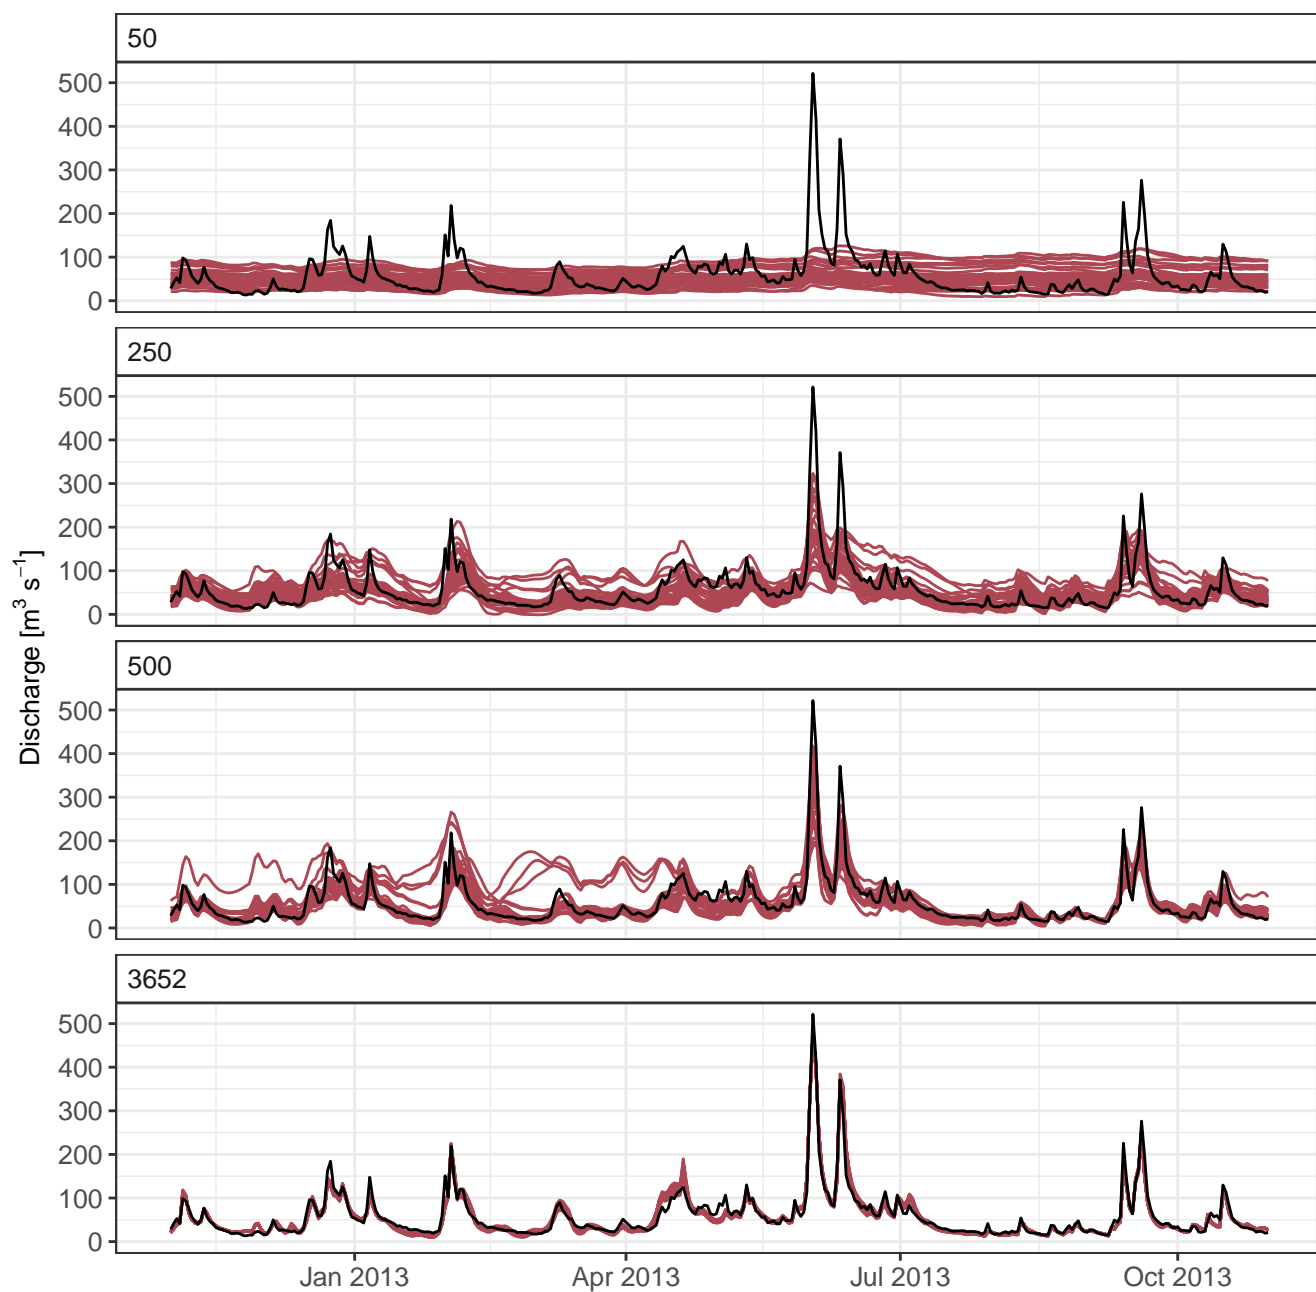

**Figure S23.** Hydrograph of the Iller at Wiblingen for the hydrological year 2013 (i.e. during validation) for four different sample sizes and all 30 repetitions for the LSTM model



**Figure S24.** Hydrograph of the Saale at Blankenstein for the hydrological year 2013 (i.e. during validation) for four different sample sizes and all 30 repetitions for the LSTM model

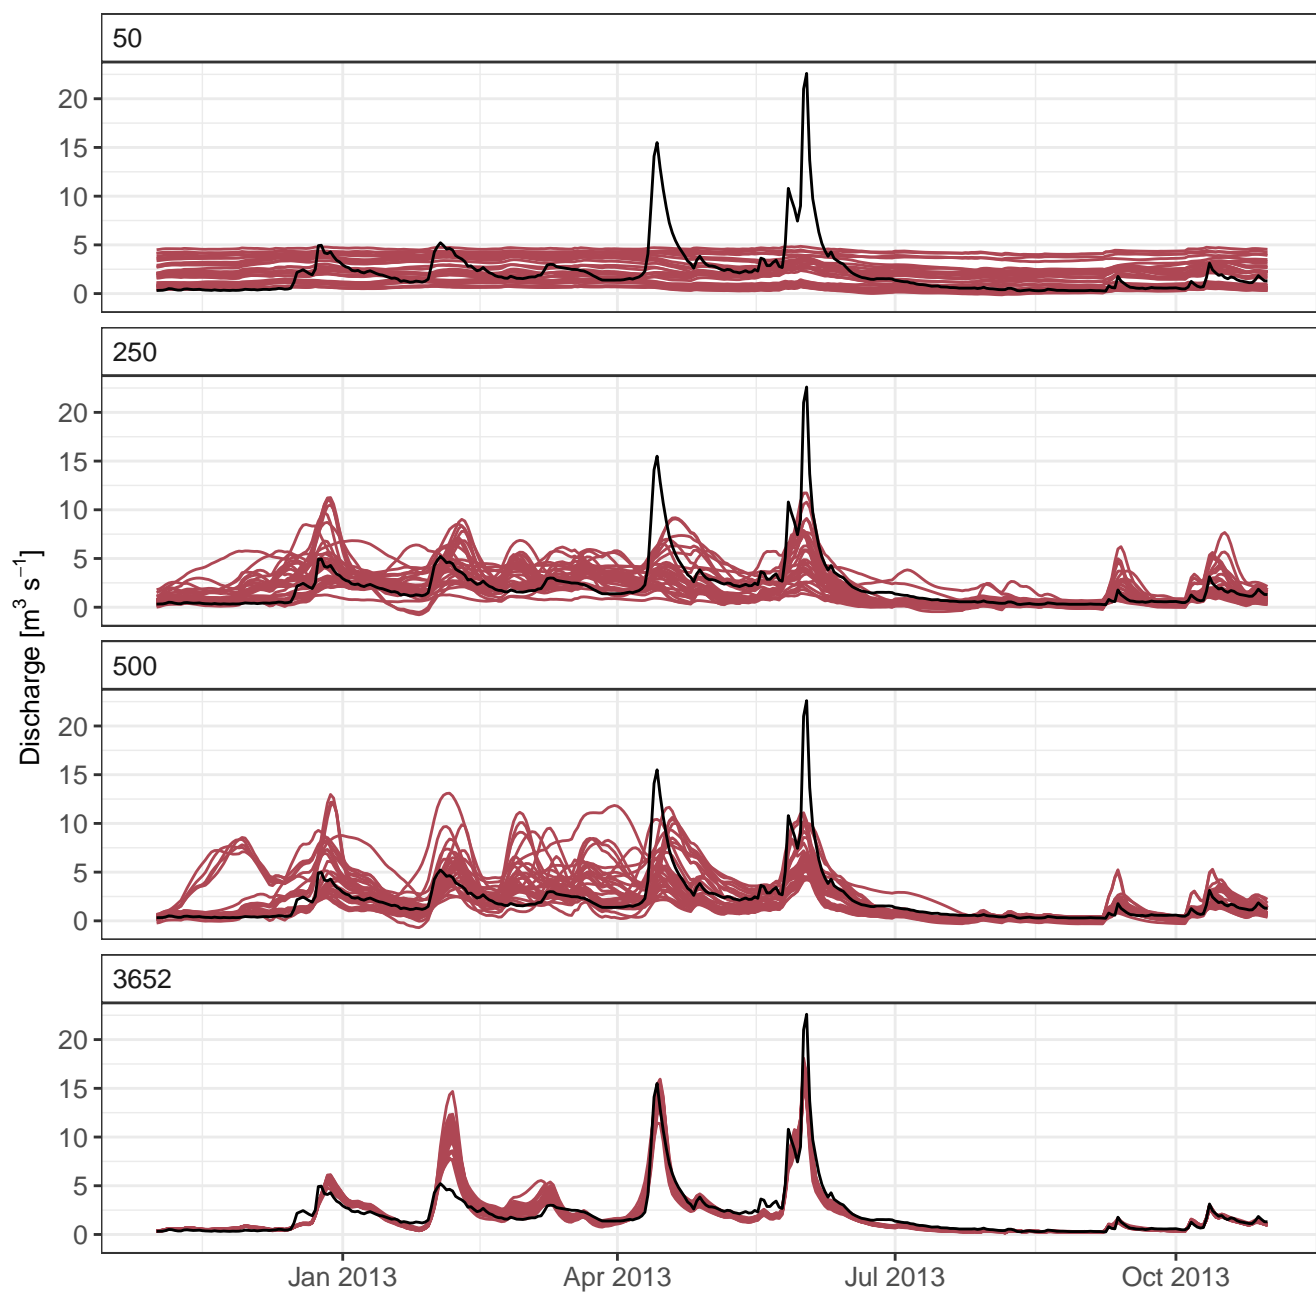

**Figure S25.** Hydrograph of the Selke at Hausneindorf for the hydrological year 2013 (i.e. during validation) for four different sample sizes and all 30 repetitions for the LSTM model
